# Supplementary material for: Chemometrics-based analysis of the phytochemical profile and antioxidant activity of Salvia species from Iran
Source: PubMed Central journal article supplement — Sci Rep. 2024 Jul 27;14:17317. doi: 10.1038/s41598-024-68421-8 (PMC11283568; doi:10.1038/s41598-024-68421-8), 2024-07-27
Supplement: 41598_2024_68421_MOESM1_ESM.pdf [file 41598_2024_68421_MOESM1_ESM.pdf]

## Supplementary Information

### **Chemometrics-based analysis of the phytochemical profile and antioxidant activity of *Salvia* species from Iran**

Atefeh Moshari-Nasirkandi<sup>1,†</sup>, Nunzia Iaccarino<sup>2,†</sup>, Francesca Romano<sup>2</sup>, Giulia Graziani<sup>2</sup>, Abolfazl Alirezalu<sup>1,\*</sup>, Hadi Alipour<sup>3</sup>, Jussara Amato<sup>2,\*</sup>

<sup>1</sup> *Department of Horticultural Sciences, Faculty of Agriculture, Urmia University, Urmia, Iran*

<sup>2</sup> *Department of Pharmacy, University of Naples Federico II, Naples, Italy*

<sup>3</sup> *Department of Plant Production and Genetics, Urmia University, Urmia, Iran*

† These authors contributed equally to this work

\*Corresponding authors

Jussara Amato – [orcid.org/0000-0001-6096-3544](https://orcid.org/0000-0001-6096-3544) – e-mail: [jussara.amato@unina.it](mailto:jussara.amato@unina.it)

Abolfazl Alirezalu – [orcid.org/0000-0002-5882-8981](https://orcid.org/0000-0002-5882-8981) – e-mail: [a.alirezalu@urmia.ac.ir](mailto:a.alirezalu@urmia.ac.ir)

**Table S1.** Sampling locations of the 102 samples of *Salvia* studied.

| Sample code | Species                | Sampling Locations     | Height | Longitude | Latitude  |
|-------------|------------------------|------------------------|--------|-----------|-----------|
| S1          | <i>S. multicaulis</i>  | Silvana                | 1629   | 44°23'04  | 39°02'40  |
| S2          | <i>S. limbata</i>      | Talebin                | 1572   | 46°37'03  | 36°59'27  |
| S3          | <i>S. syriaca</i>      | Shiban                 | 1681   | 44°37'42  | 37°34'44  |
| S4          | <i>S. multicaulis</i>  | Mavana                 | 1630   | 44°57'11  | 38°00'46  |
| S5          | <i>S. verticillata</i> | Mavana                 | 1630   | 44°17'15  | 39°01'57  |
| S6          | <i>S. nemorosa</i>     | Silvana                | 1629   | 44°56'19  | 38°00'17  |
| S7          | <i>S. officinalis</i>  | Urmia University       | 1366   | 46°11'34  | 36°23'43  |
| S8          | <i>S. officinalis</i>  | Urmia University       | 1366   | 46°38'31  | 36°58'04  |
| S9          | <i>S. atropatana</i>   | Kuh-e Sir daghi        | 1897   | 46°11'39  | 36°23'36  |
| S10         | <i>S. sclarea</i>      | Urmia University       | 1366   | 45°17'14  | 36°29'36  |
| S11         | <i>S. syriaca</i>      | Baruq                  | 1355   | 46°12'38  | 36°36'42  |
| S12         | <i>S. multicaulis</i>  | Aghbolagh              | 1832   | 46°38'31  | 36°58'04  |
| S13         | <i>S. nemorosa</i>     | Aghbolagh              | 1832   | 45°07'18  | 37°17'57  |
| S14         | <i>S. limbata</i>      | Aghbolagh              | 1832   | 46°38'30  | 36°58'10  |
| S15         | <i>S. multicaulis</i>  | Hesarlu                | 1950   | 45°17'14  | 36°29'36  |
| S16         | <i>S. syriaca</i>      | Shahindej-Tekab Rd     | 2207   | 45°17'14  | 36°29'36  |
| S17         | <i>S. nemorosa</i>     | Urmia-Mahabad Rd       | 1318   | 45°43'24  | 36°52'45  |
| S18         | <i>S. syriaca</i>      | Naghadeh-Piranshahr Rd | 1395   | 45°19'2.5 | 36°55'58  |
| S19         | <i>S. atropatana</i>   | Naghadeh-Piranshahr Rd | 1395   | 45°19'2.5 | 36°55'58  |
| S20         | <i>S. bracteata</i>    | Naghadeh-Piranshahr Rd | 1395   | 45°19'2.5 | 36°55'58  |
| S21         | <i>S. nemorosa</i>     | Miandoab               | 1298   | 46° 9'48  | 36°56'27  |
| S22         | <i>S. bracteata</i>    | Piranshahr-Sardasht Rd | 1456   | 45°17'17  | 36°29'31  |
| S23         | <i>S. nemorosa</i>     | Piranshahr-Sardasht Rd | 1456   | 45°17'17  | 36°29'31  |
| S24         | <i>S. limbata</i>      | Bukan                  | 1328   | 46°11'42  | 36°30'26  |
| S25         | <i>S. spinosa</i>      | Bukan                  | 1328   | 46°11'42  | 36°30'26  |
| S26         | <i>S. spinosa</i>      | Saqqez                 | 1520   | 46°15'36  | 36°17'33  |
| S27         | <i>S. syriaca</i>      | Saqqez                 | 1520   | 46°15'36  | 36°17'33  |
| S28         | <i>S. staminea</i>     | Qahreman Kandi         | 2082   | 44°15'48  | 39°15'1.0 |
| S29         | <i>S. multicaulis</i>  | Saqqez                 | 1520   | 46°15'36  | 36°17'33  |
| S30         | <i>S. nemorosa</i>     | Utmish                 | 1414   | 46° 1'58  | 36°40'36  |
| S31         | <i>S. spinosa</i>      | Mahabad-Miandoab Rd    | 1312   | 45°47'13  | 36°50'43  |
| S32         | <i>S. spinosa</i>      | Qushchi                | 1362   | 44°59'59  | 37°57'28  |
| S33         | <i>S. syriaca</i>      | Qushchi                | 1362   | 44°59'59  | 37°57'28  |
| S34         | <i>S. ceratophylla</i> | Qushchi                | 1362   | 44°59'59  | 37°57'28  |
| S35         | <i>S. atropatana</i>   | Qushchi                | 1362   | 44°59'59  | 37°57'28  |
| S36         | <i>S. nemorosa</i>     | Noshin Shahr           | 1316   | 45° 3'9.0 | 37°44'12  |
| S37         | <i>S. verticillata</i> | Qasemlu                | 1339   | 45° 9'13  | 37°21'5.7 |
| S38         | <i>S. nemorosa</i>     | Qasemlu                | 1339   | 45° 9'13  | 37°21'5.7 |
| S39         | <i>S. limbata</i>      | Qasemlu                | 1339   | 45° 9'13  | 37°21'5.7 |
| S40         | <i>S. syriaca</i>      | Qasemlu                | 1339   | 45° 9'13  | 37°21'5.7 |
| S41         | <i>S. nemorosa</i>     | Qasemlu                | 1339   | 45° 9'13  | 37°21'5.7 |
| S42         | <i>S. multicaulis</i>  | Qasemlu                | 1339   | 45° 9'13  | 37°21'5.7 |
| S43         | <i>S. nemorosa</i>     | Anhar Rd               | 1404   | 44°58'55  | 37°35'36  |
| S44         | <i>S. sclarea</i>      | Marmisho               | 1746   | 44°38'14  | 37°35'2.5 |
| S45         | <i>S. macrochlamys</i> | Marmisho               | 1746   | 44°38'14  | 37°35'2.5 |
| S46         | <i>S. syriaca</i>      | Marmisho               | 1746   | 44°38'14  | 37°35'2.5 |
| S47         | <i>S. verticillata</i> | Marmisho               | 1746   | 44°38'14  | 37°35'2.5 |
| S48         | <i>S. nemorosa</i>     | Marmisho               | 1746   | 44°38'14  | 37°35'2.5 |
| S49         | <i>S. candidissima</i> | Marmisho               | 1746   | 44°38'14  | 37°35'2.5 |
| S50         | <i>S. limbata</i>      | Marmisho               | 1746   | 44°38'14  | 37°35'2.5 |
| S51         | <i>S. syriaca</i>      | Serow Rd               | 1346   | 44°58'40  | 37°40'1.2 |
| S52         | <i>S. limbata</i>      | Serow Rd               | 1346   | 44°58'40  | 37°40'1.2 |
| S53         | <i>S. nemorosa</i>     | Serow Rd               | 1346   | 44°58'40  | 37°40'1.2 |
| S54         | <i>S. verticillata</i> | Qurdik                 | 2060   | 44°42'4.7 | 38°41'3.8 |
| S55         | <i>S. limbata</i>      | Qurdik                 | 2060   | 44°42'4.7 | 38°41'3.8 |
| S56         | <i>S. limbata</i>      | Shahin Dej-Tekab Rd    | 2207   | 46°51'9.5 | 36°30'35  |
| S57         | <i>S. multicaulis</i>  | Tekab                  | 1732   | 47° 4'29  | 36°26'55  |
| S58         | <i>S. syriaca</i>      | Takhte-Soleiman        | 1776   | 47° 6'16  | 36°24'42  |
| S59         | <i>S. nemorosa</i>     | Khoy                   | 1337   | 44°48'29  | 38°37'7.8 |

|      |                        |                         |      |           |           |
|------|------------------------|-------------------------|------|-----------|-----------|
| S60  | <i>S. aethiopsis</i>   | Dalamper                | 2784 | 44°48'20  | 37°10'46  |
| S61  | <i>S. limbata</i>      | Takhte-Soleiman         | 1776 | 47° 6'16  | 36°24'42  |
| S62  | <i>S. sahendica</i>    | Tabriz                  | 2658 | 46°17'42  | 37°45'21  |
| S63  | <i>S. nemorosa</i>     | Daryan                  | 1676 | 45°38'31  | 38°12'54  |
| S64  | <i>S. verticillata</i> | Daryan                  | 1676 | 45°38'31  | 38°12'54  |
| S65  | <i>S. aethiopsis</i>   | Khoy                    | 1337 | 44°48'29  | 38°37'7.8 |
| S66  | <i>S. spinosa</i>      | Urmia-Tabriz Rd         | 1336 | 46° 2'25  | 37°57'53  |
| S67  | <i>S. multicaulis</i>  | Urmia-Tabriz Rd         | 1336 | 46° 2'25  | 37°57'53  |
| S68  | <i>S. limbata</i>      | Gareziaedin             | 1117 | 45° 2'15  | 38°54'58  |
| S69  | <i>S. syriaca</i>      | Nokhtalu                | 1873 | 46°41'11  | 36°59'25  |
| S70  | <i>S. multicaulis</i>  | Nokhtalu                | 1873 | 46°41'11  | 36°59'25  |
| S71  | <i>S. limbata</i>      | Nokhtalu                | 1873 | 46°41'11  | 36°59'25  |
| S72  | <i>S. syriaca</i>      | Daryan                  | 1676 | 45°38'31  | 38°12'54  |
| S73  | <i>S. limbata</i>      | Daryan                  | 1676 | 45°38'31  | 38°12'54  |
| S74  | <i>S. ceratophylla</i> | Daryan                  | 1676 | 45°38'31  | 38°12'54  |
| S75  | <i>S. spinosa</i>      | Cheshmeh Kanan          | 1446 | 45°12'32  | 38°19'56  |
| S76  | <i>Salvia</i> sp.      | Tupchi                  | 1447 | 45°10'46  | 38°19'46  |
| S77  | <i>S. nemorosa</i>     | Tasuj                   | 1360 | 45°20'48  | 38°18'52  |
| S78  | <i>S. ceratophylla</i> | Miandoab-Bukan Rd       | 1325 | 46°12'17  | 36°37'35  |
| S79  | <i>S. syriaca</i>      | Bukan-Mahabad Rd        | 1738 | 45°56'12  | 36°42'32  |
| S80  | <i>S. limbata</i>      | Bukan-Mahabad Rd        | 1738 | 45°56'12  | 36°42'32  |
| S81  | <i>S. limbata</i>      | Mahabad-Miandoab Rd     | 1312 | 45°47'13  | 36°50'43  |
| S82  | <i>S. poculata</i>     | Qushchi                 | 1362 | 44°59'59  | 37°57'28  |
| S83  | <i>S. hydrangea</i>    | Qushchi                 | 1362 | 44°59'59  | 37°57'28  |
| S84  | <i>S. syriaca</i>      | Salmas-Khoy Rd          | 1177 | 44°56'15  | 38°28'18  |
| S85  | <i>S. ceratophylla</i> | Khalifatan              | 1524 | 44°52'31  | 37°34'42  |
| S86  | <i>S. limbata</i>      | Chaldoran               | 1820 | 44°22'45  | 39° 4'22  |
| S87  | <i>S. multicaulis</i>  | Khalifatan              | 1524 | 44°52'31  | 37°34'42  |
| S88  | <i>S. grossheimii</i>  | Khaneqah Sorkh          | 1366 | 45° 2'3.3 | 37°45'9.5 |
| S89  | <i>S. multicaulis</i>  | Khaneqah Sorkh          | 1366 | 45° 2'3.3 | 37°45'9.5 |
| S90  | <i>S. multicaulis</i>  | Marmisho                | 1746 | 44°38'14  | 37°35'2.5 |
| S91  | <i>S. verticillata</i> | Marmisho                | 1746 | 44°38'14  | 37°35'2.5 |
| S92  | <i>S. syriaca</i>      | Marmisho-Serow Rd       | 1365 | 44°55'57  | 37°40'20  |
| S93  | <i>S. multicaulis</i>  | Marmisho-Serow Rd       | 1365 | 44°55'57  | 37°40'20  |
| S94  | <i>S. aethiopsis</i>   | Marmisho-Serow Rd       | 1365 | 44°55'57  | 37°40'20  |
| S95  | <i>S. hydrangea</i>    | Marmisho-Serow Rd       | 1365 | 44°55'57  | 37°40'20  |
| S96  | <i>S. macrochlamys</i> | Marmisho-Serow Rd       | 1365 | 44°55'57  | 37°40'20  |
| S97  | <i>S. ceratophylla</i> | Marmisho-Serow Rd       | 1365 | 44°55'57  | 37°40'20  |
| S98  | <i>S. atropatana</i>   | Mishodagh               | 1900 | 45°37'51  | 38°16'37  |
| S99  | <i>S. sclarea</i>      | Piranshahr-Sardasht Rd  | 1456 | 45°17'17  | 36°29'31  |
| S100 | <i>S. nemorosa</i>     | Maku                    | 1335 | 44°28'56  | 39°16'10  |
| S101 | <i>S. syriaca</i>      | Oshnavieh-Piranshahr Rd | 1436 | 45° 5'35  | 37° 0'31  |
| S102 | <i>S. multicaulis</i>  | Oshnavieh-Piranshahr Rd | 1436 | 45° 5'35  | 37° 0'31  |

RT: 0.00 - 9.00

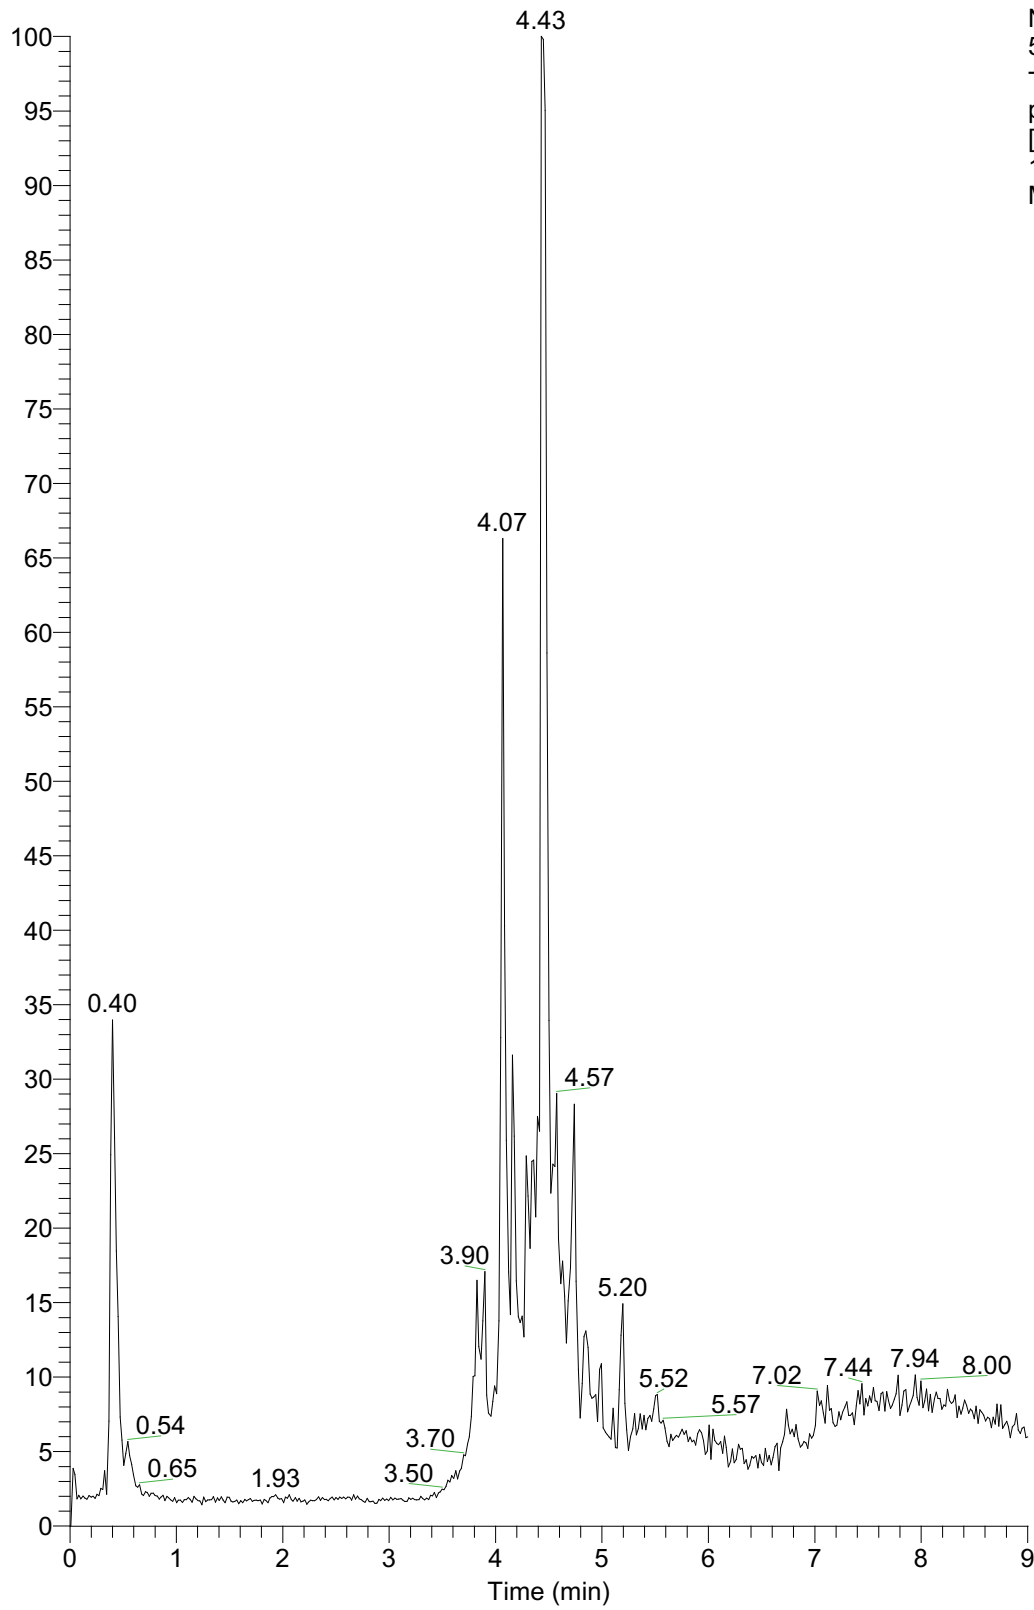

NL:  
5.25E9  
TIC F: FTMS -  
p ESI Full ms  
[100.0000-  
1200.0000]  
MS sample\_1

Figure S1: Representative chromatogram of an extract of *S. multicaulis* (sample S1).

RT: 0.00 - 9.01

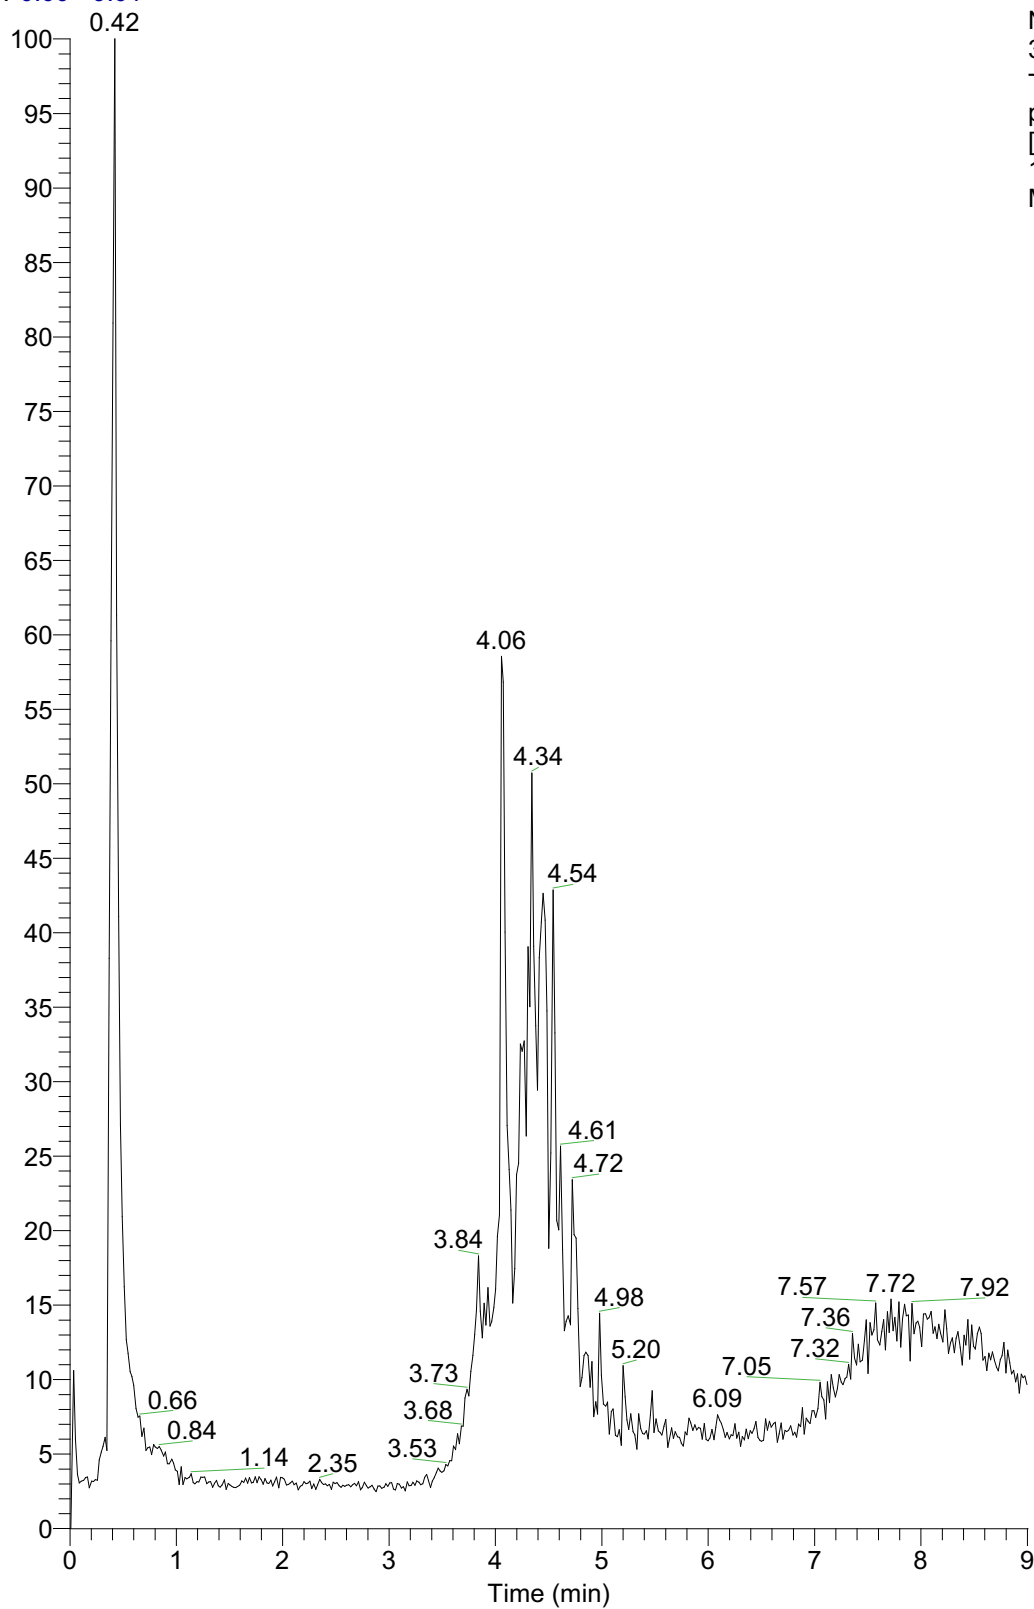

NL:  
3.17E9  
TIC F: FTMS -  
p ESI Full ms  
[100.0000-  
1200.0000]  
MS sample\_2

Figure S2: Representative chromatogram of an extract of *S. limbata* (sample S2).

RT: 0.00 - 9.01

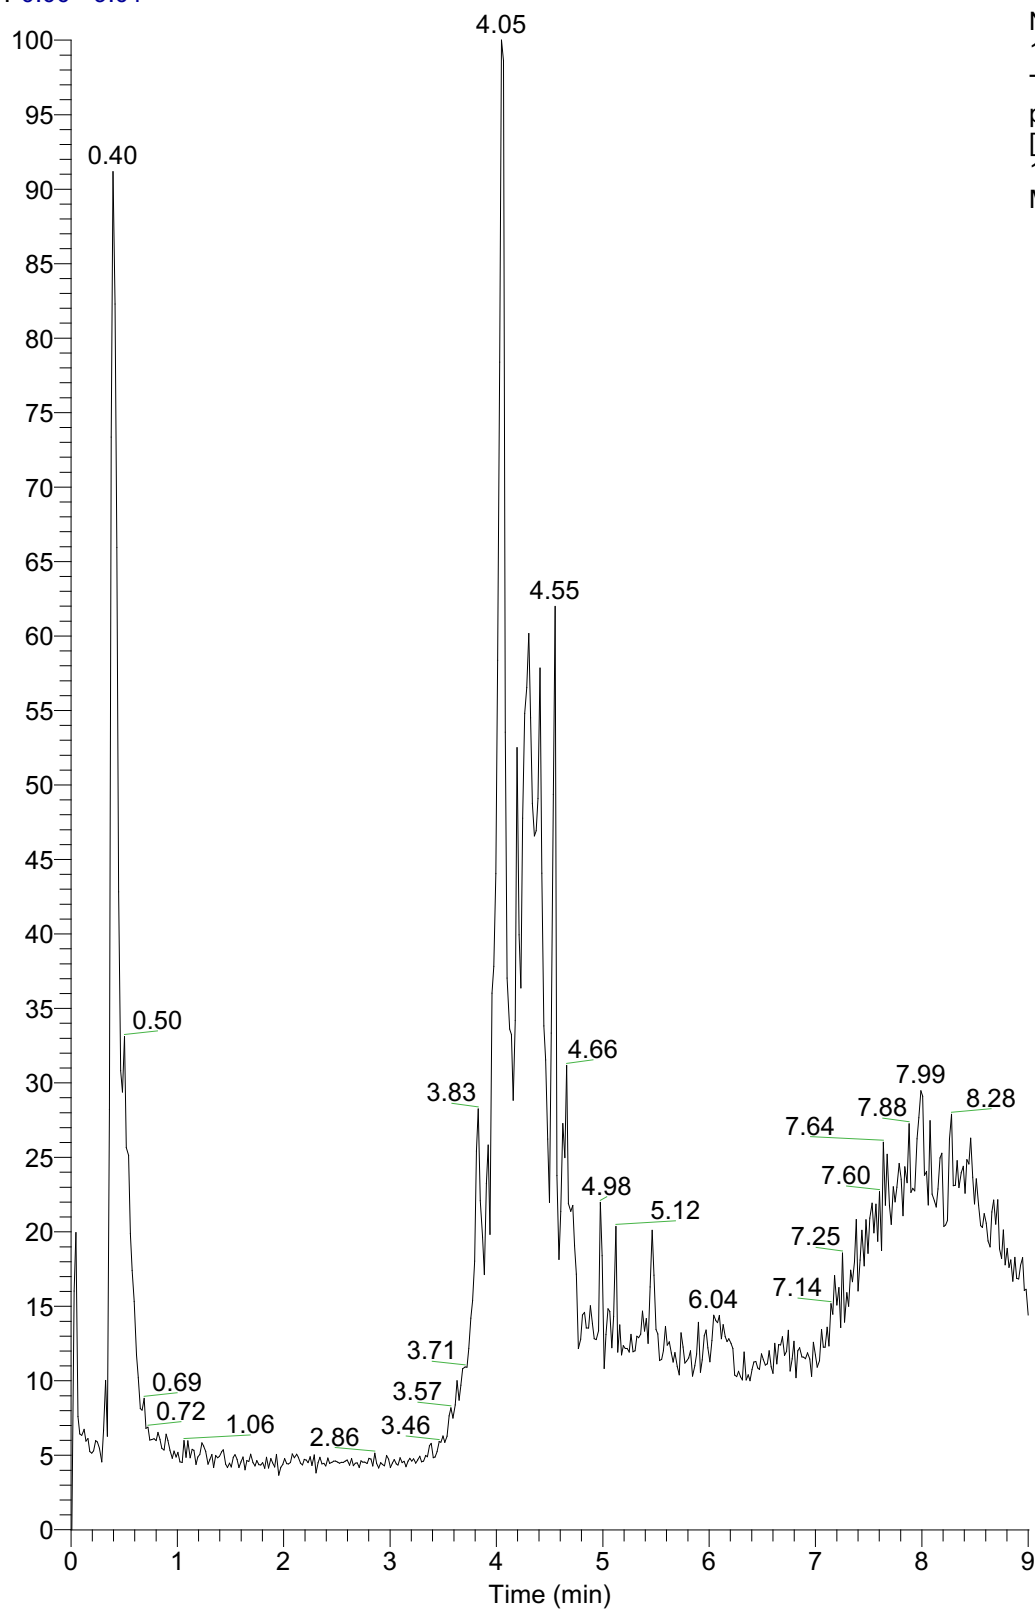

NL:  
1.77E9  
TIC F: FTMS -  
p ESI Full ms  
[100.0000-  
1200.0000]  
MS sample\_3

**Figure S3:** Representative chromatogram of an extract of *S. syriaca* (sample S3).

RT: 0.00 - 9.01

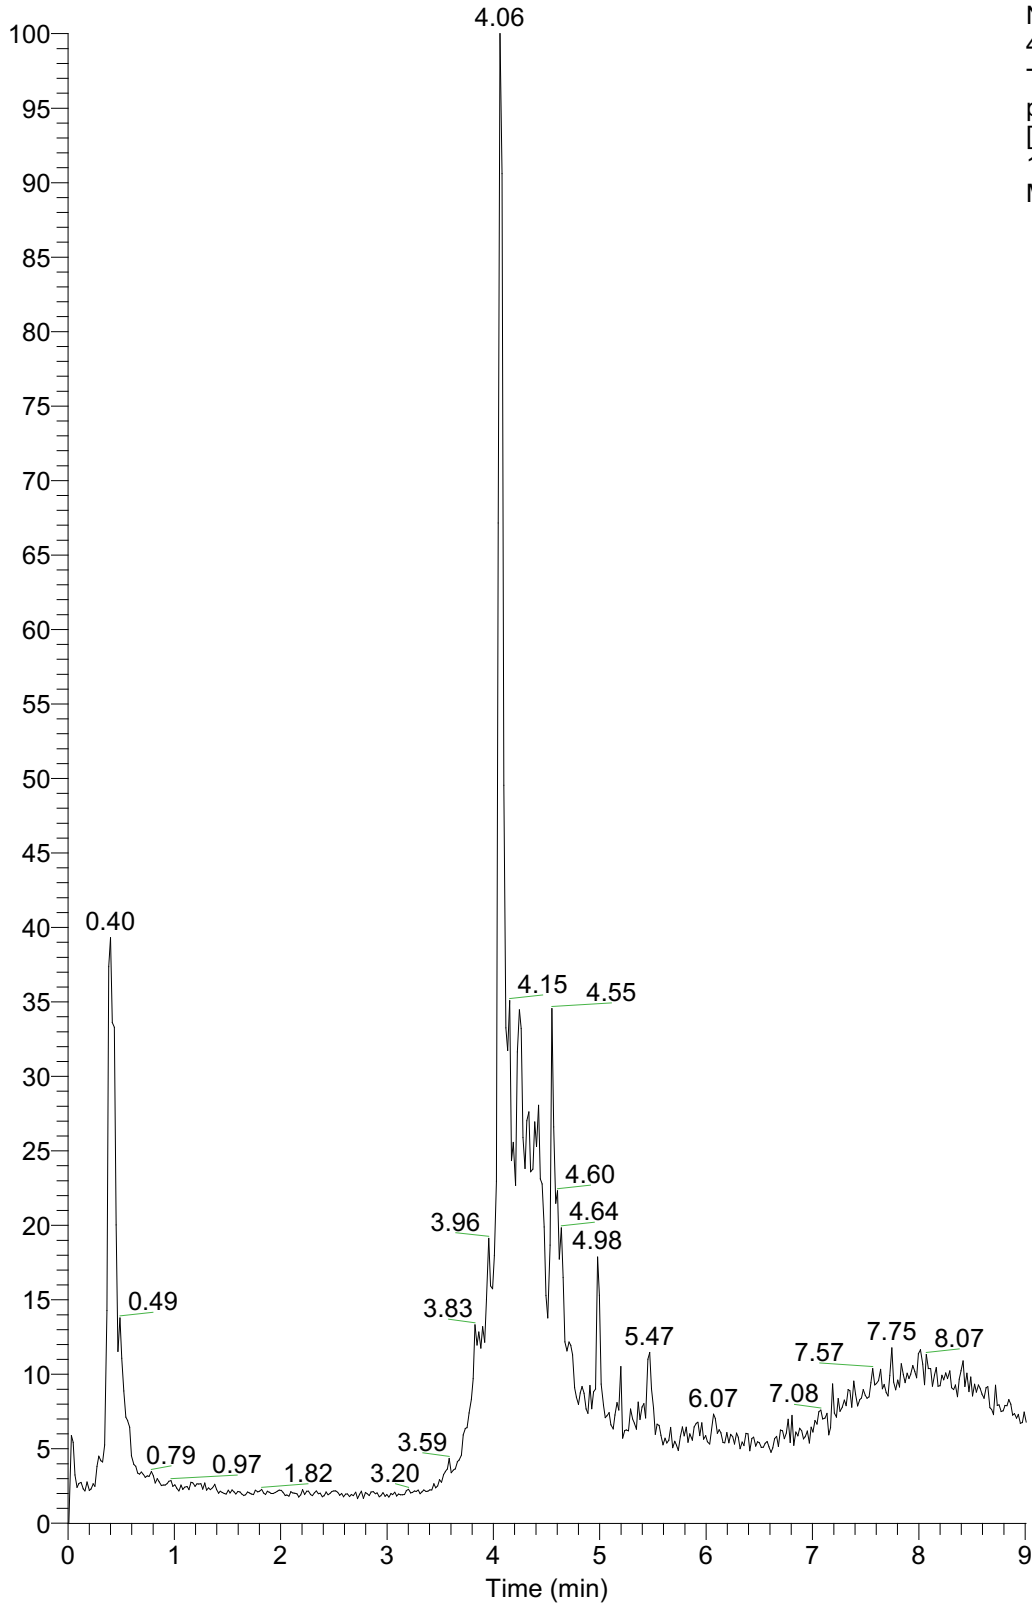

NL:  
4.09E9  
TIC F: FTMS -  
p ESI Full ms  
[100.0000-  
1200.0000]  
MS sample\_5

Figure S4: Representative chromatogram of an extract of *S. verticillata* (sample S5).

RT: 0.00 - 9.01

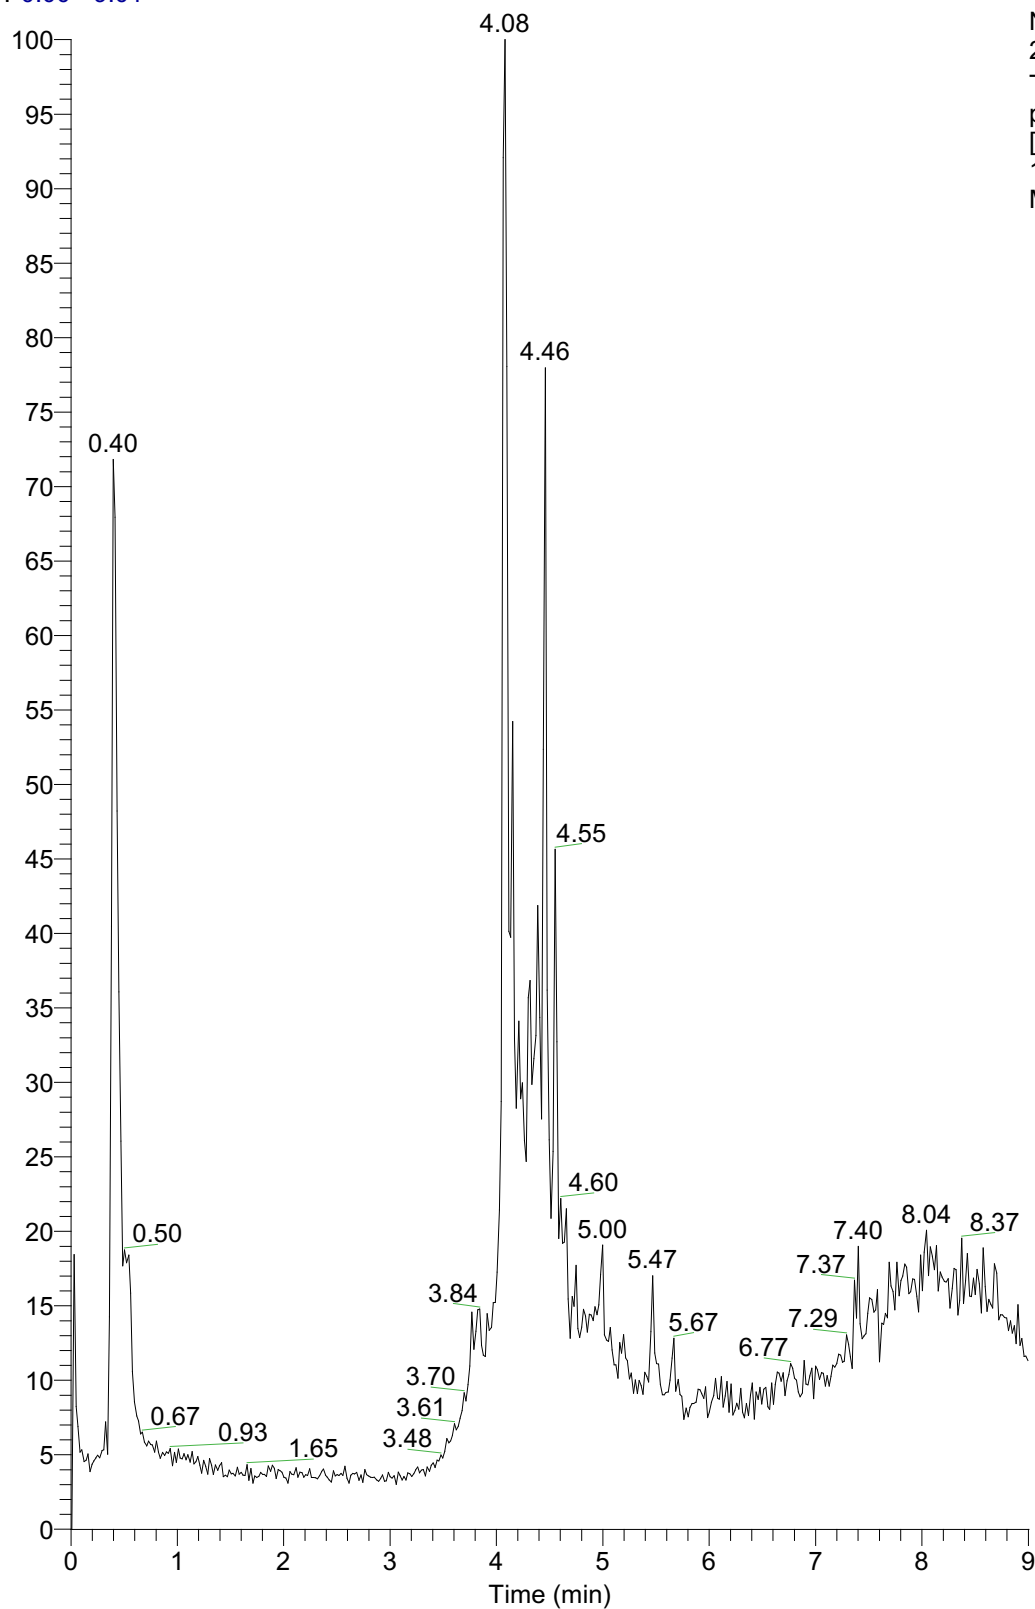

NL:  
2.20E9  
TIC F: FTMS -  
p ESI Full ms  
[100.0000-  
1200.0000]  
MS sample\_6

Figure S5: Representative chromatogram of an extract of *S. nemorosa* (sample S6).



RT: 0.00 - 9.00

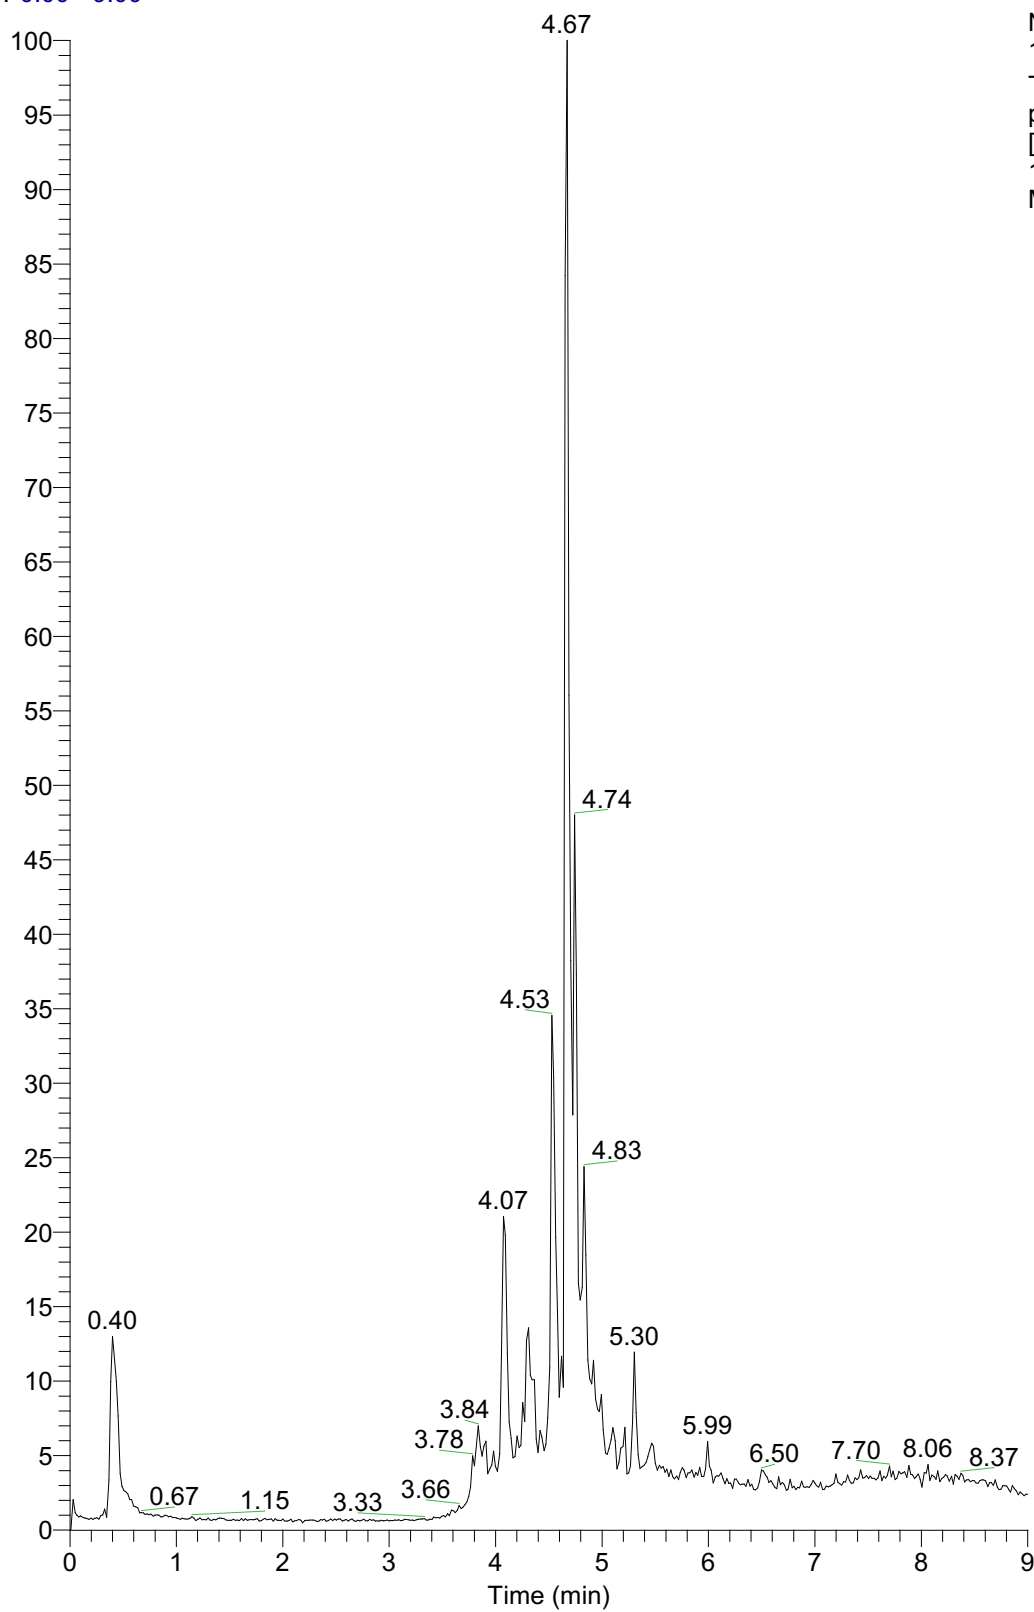

NL:  
1.17E10  
TIC F: FTMS -  
p ESI Full ms  
[100.0000-  
1200.0000]  
MS sample\_7

Figure S6: Representative chromatogram of an extract of *S. officinalis* (sample S7).

RT: 0.00 - 9.01

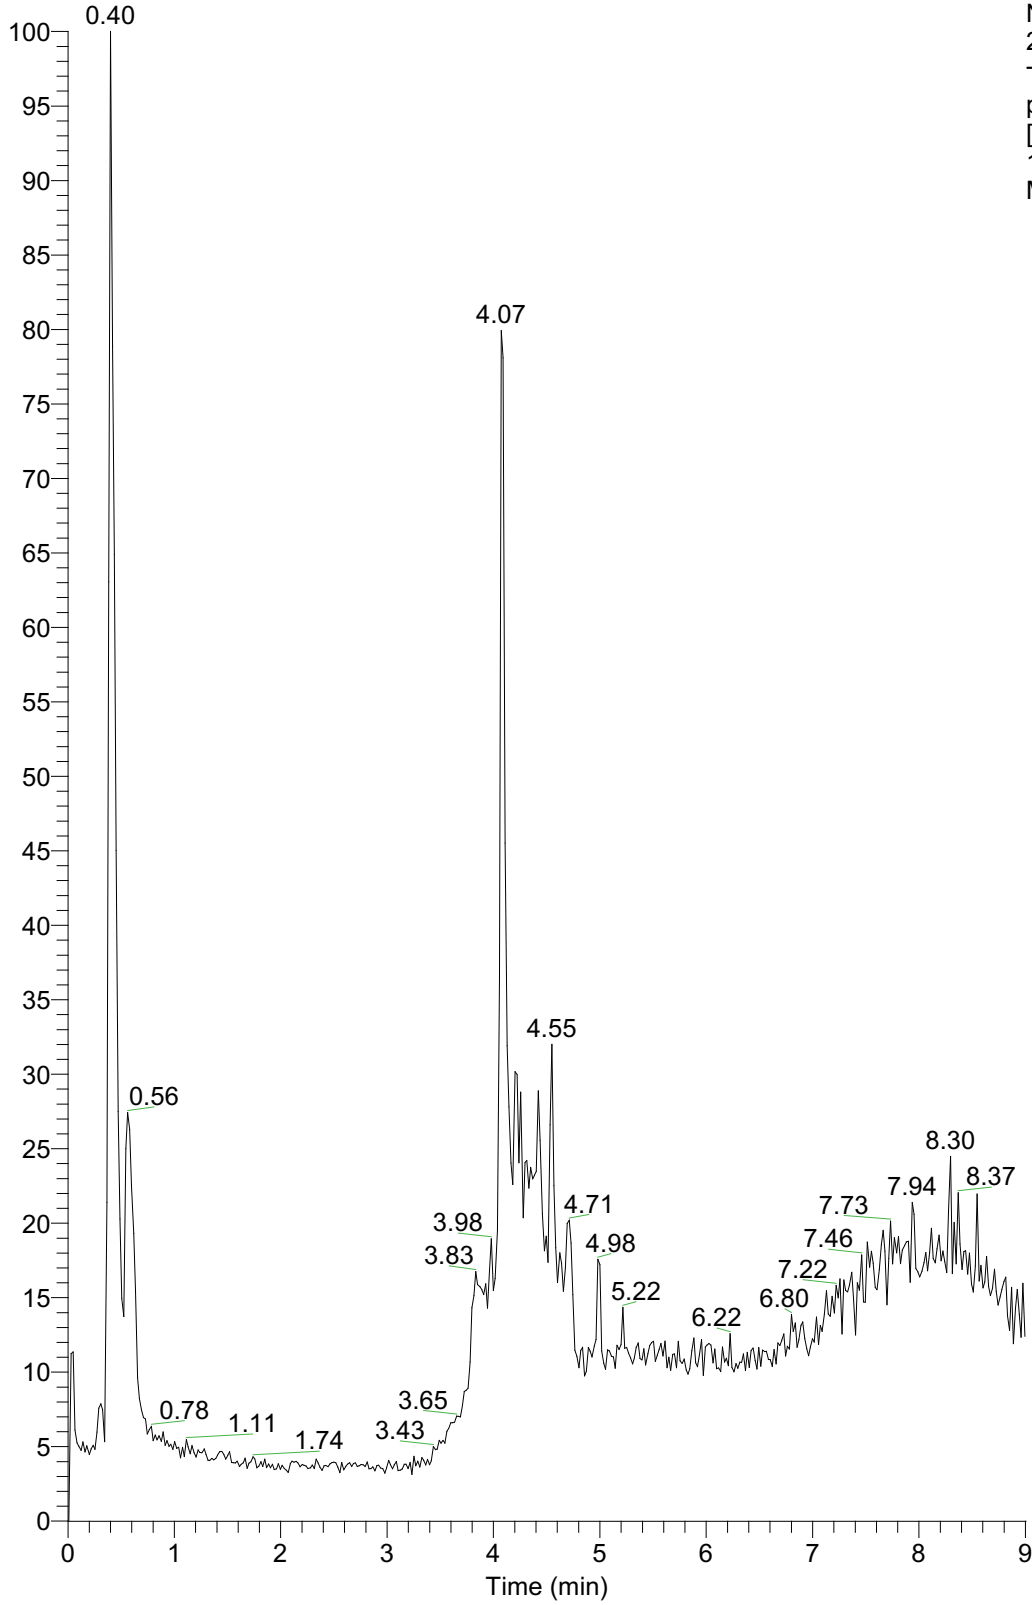

NL:  
2.08E9  
TIC F: FTMS -  
p ESI Full ms  
[100.0000-  
1200.0000]  
MS sample\_9

Figure S7: Representative chromatogram of a *S. atropatana* extract (sample S9).

RT: 0.00 - 9.01

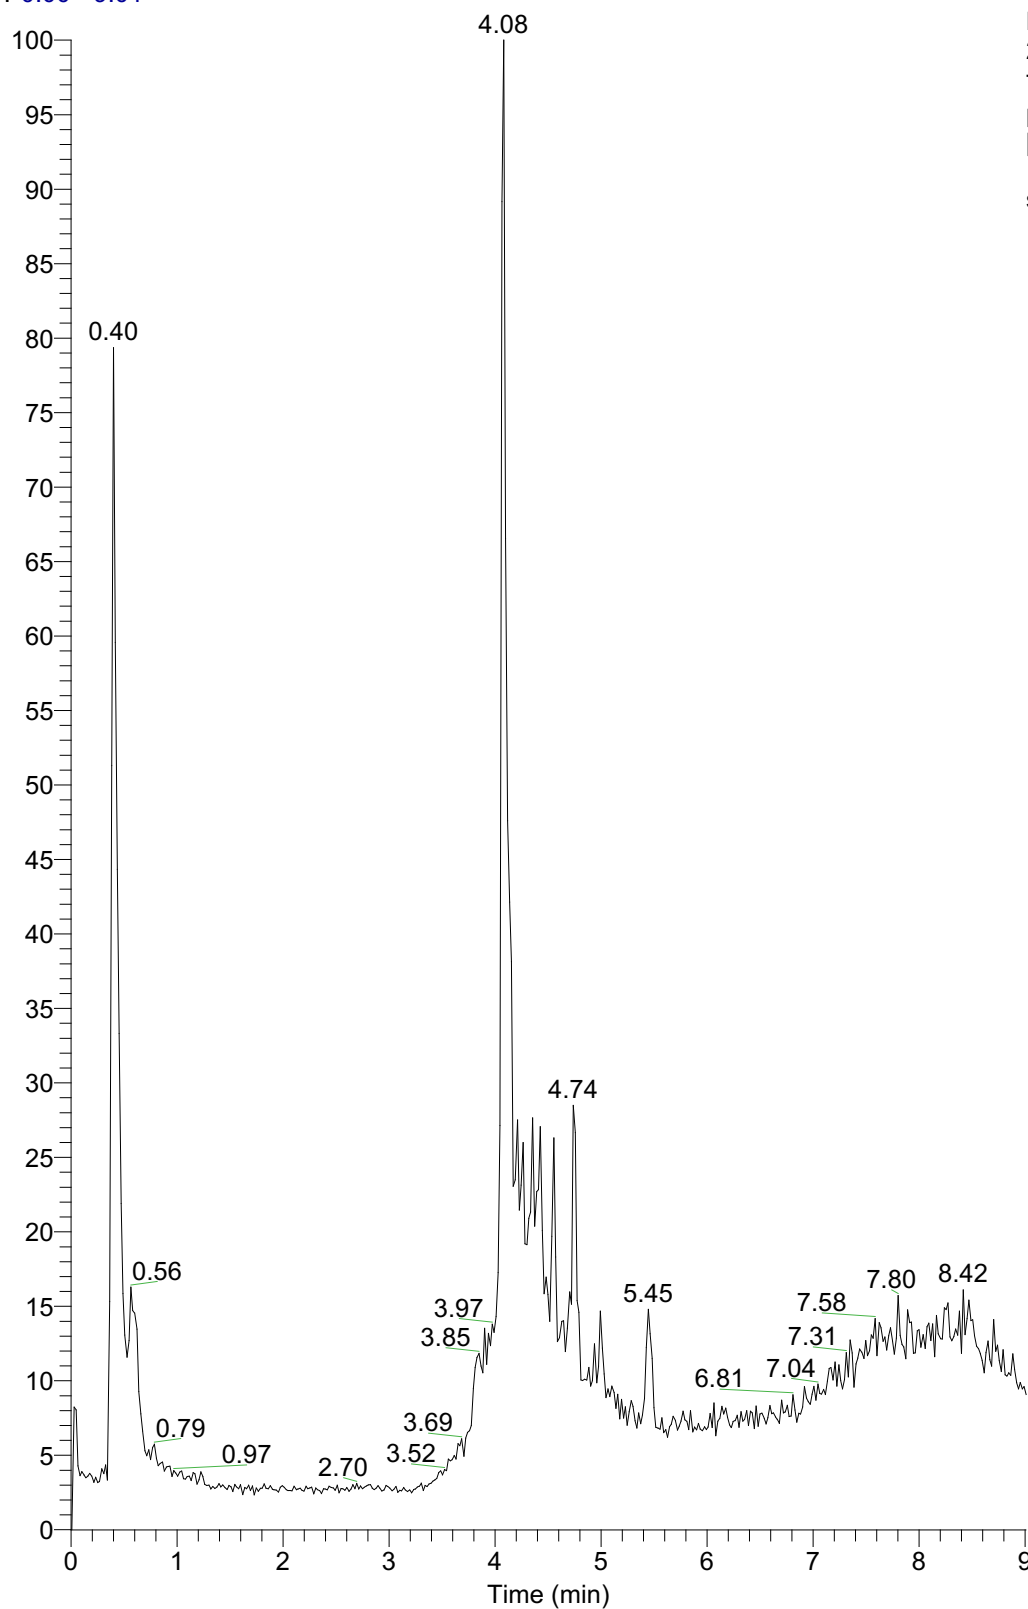

NL:  
2.76E9  
TIC F: FTMS -  
p ESI Full ms  
[100.0000-  
1200.0000] MS  
sample\_10

Figure S8: Representative chromatogram of a *S. sclarea* extract (sample S10).

RT: 0.00 - 9.01

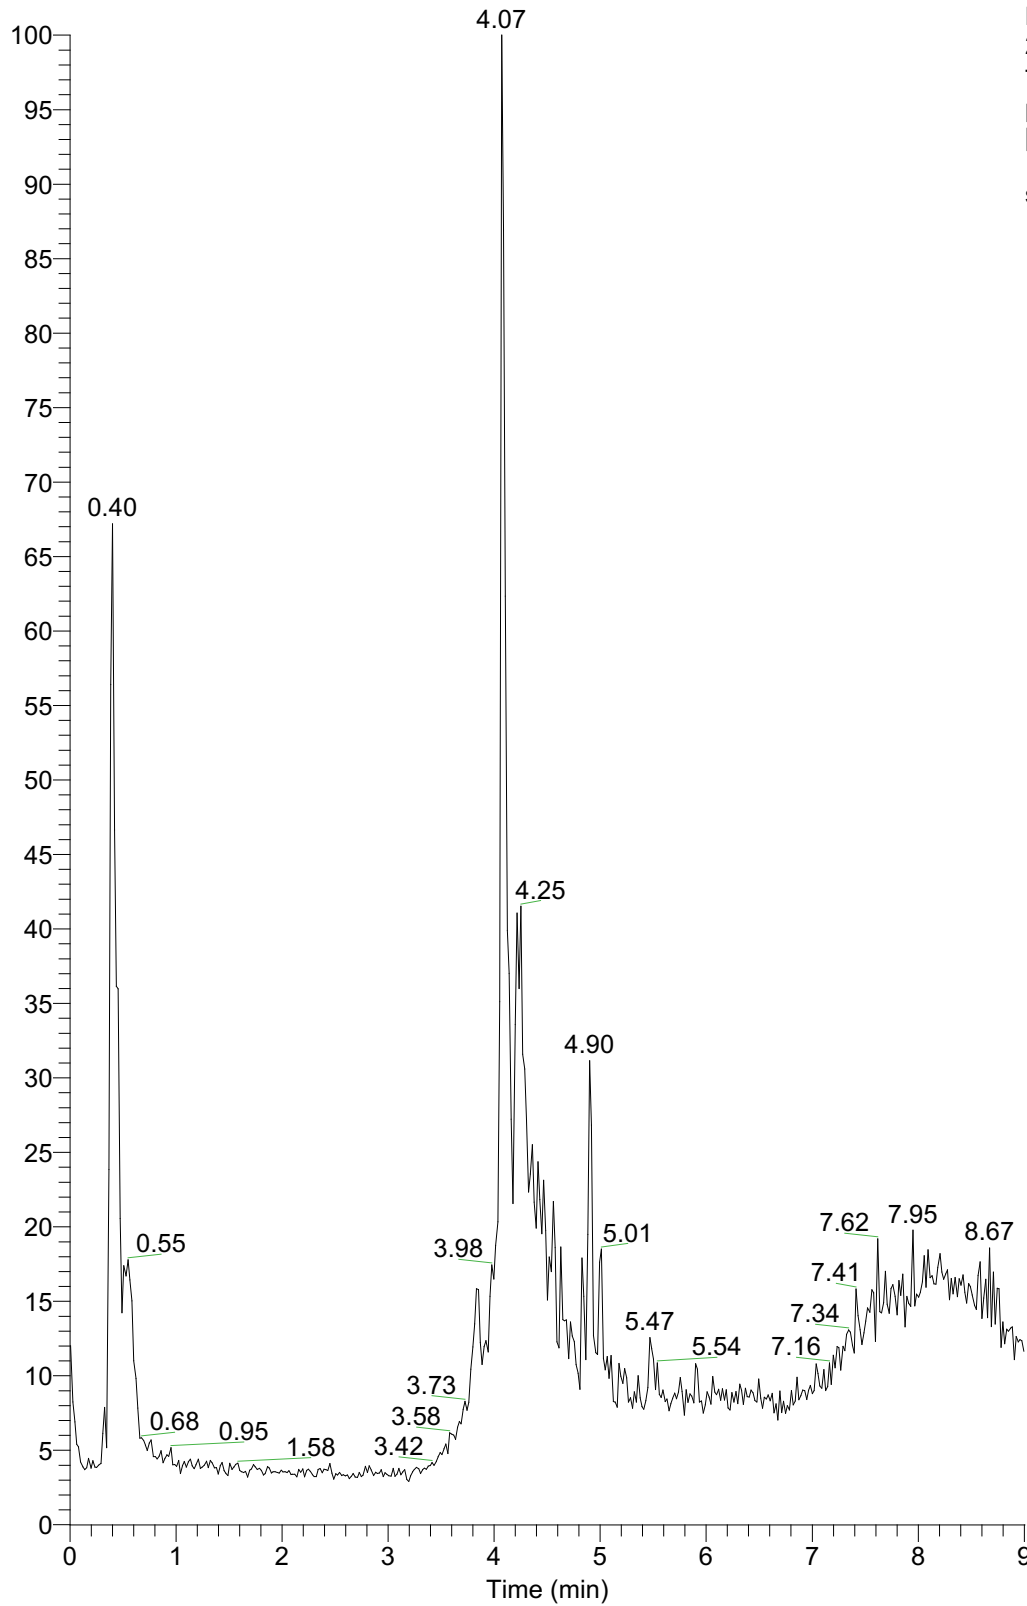

NL:  
2.18E9  
TIC F: FTMS -  
p ESI Full ms  
[100.0000-  
1200.0000] MS  
sample\_20

**Figure S9:** Representative chromatogram of an extract of *S. bracteata* (sample S20).

RT: 0.00 - 9.01

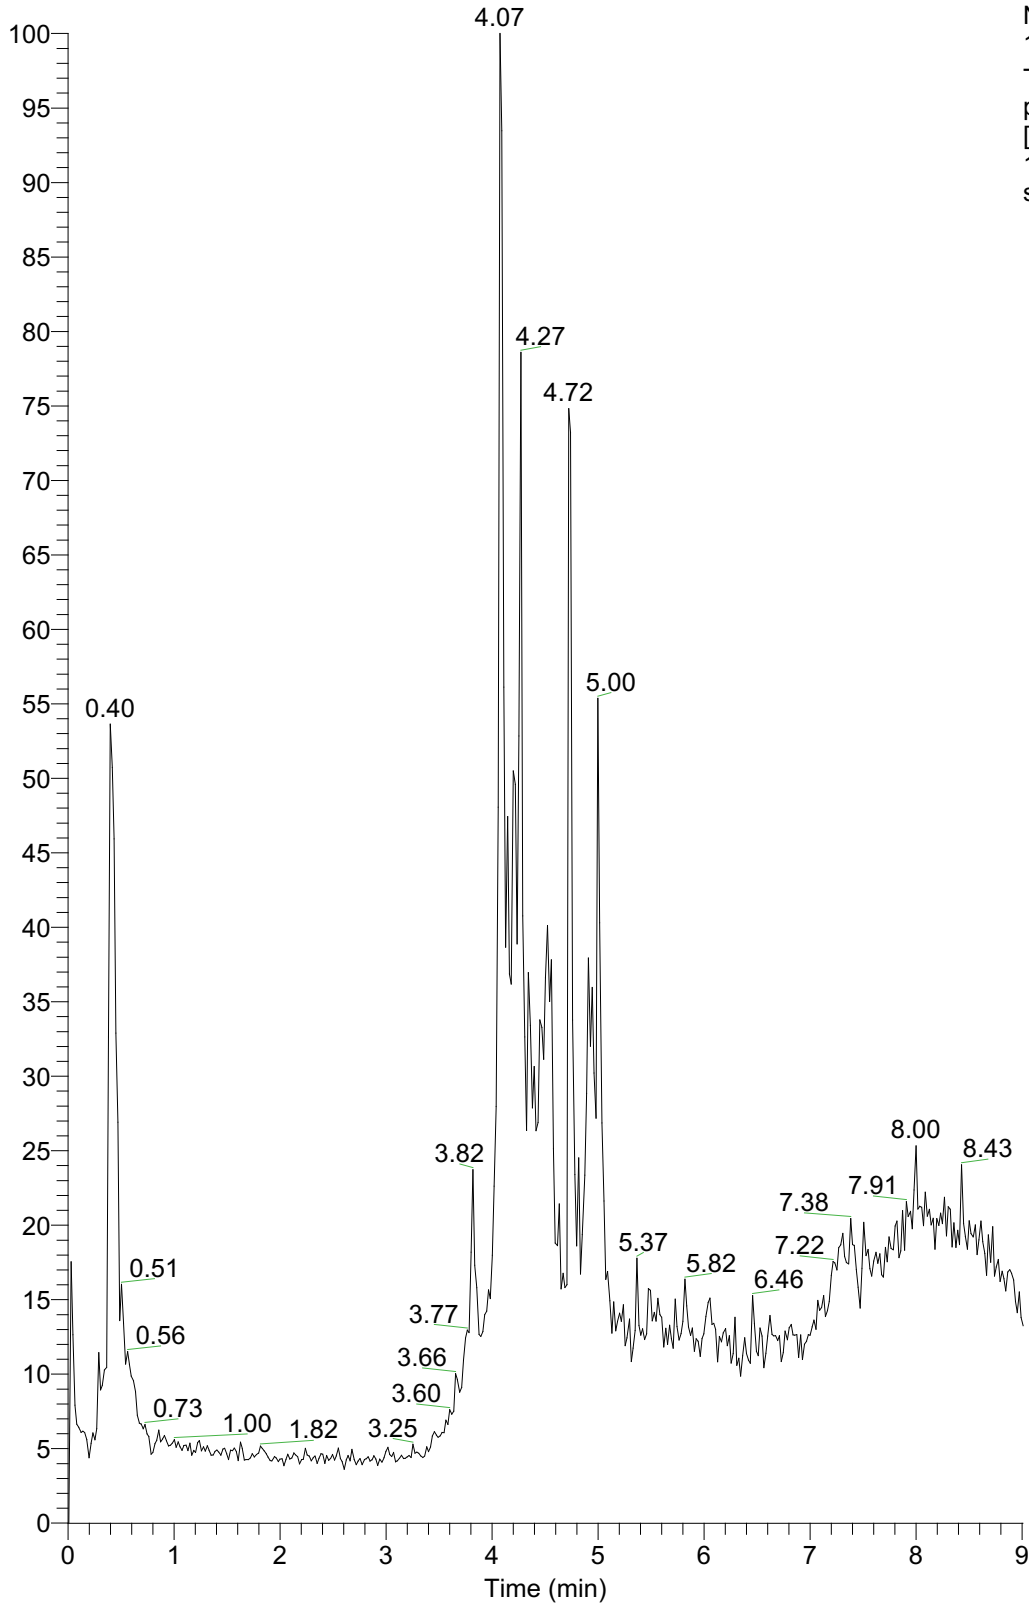

NL:  
1.62E9  
TIC F: FTMS -  
p ESI Full ms  
[100.0000-  
1200.0000] MS  
sample\_25

Figure S10: Representative chromatogram of an extract of *S. spinosa* (sample S25).

RT: 0.00 - 9.01

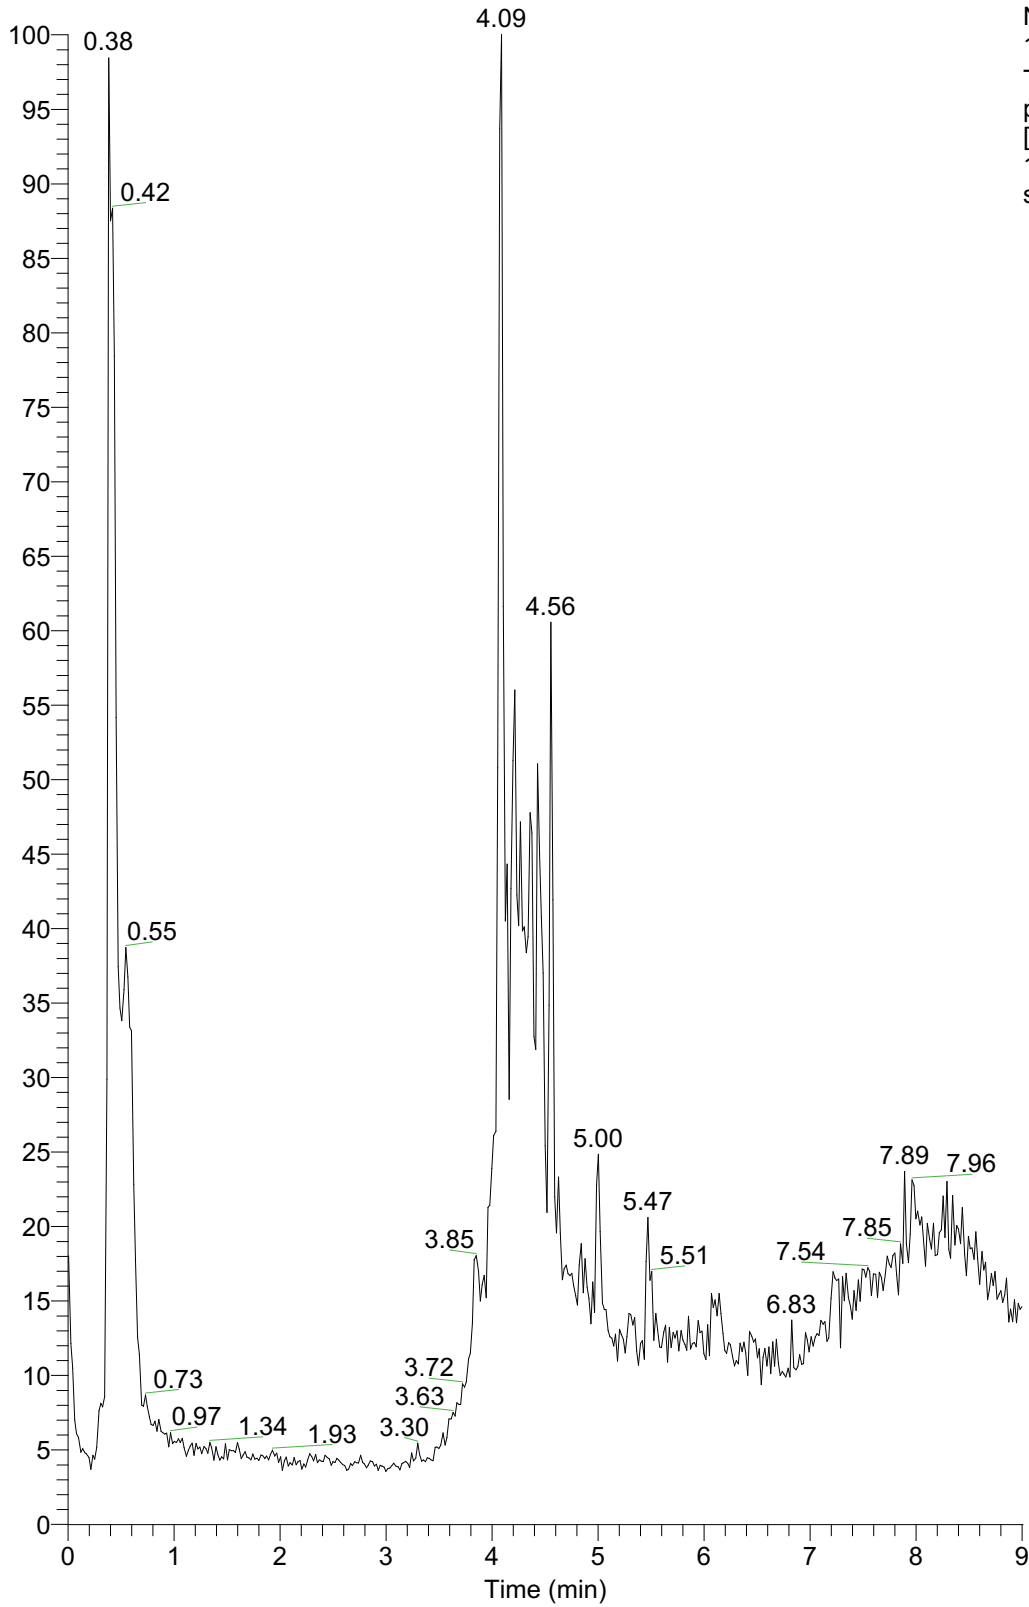

NL:  
1.79E9  
TIC F: FTMS -  
p ESI Full ms  
[100.0000-  
1200.0000] MS  
sample\_28

Figure S11: Representative chromatogram of a *S. staminea* extract (sample S28).

RT: 0.00 - 9.01

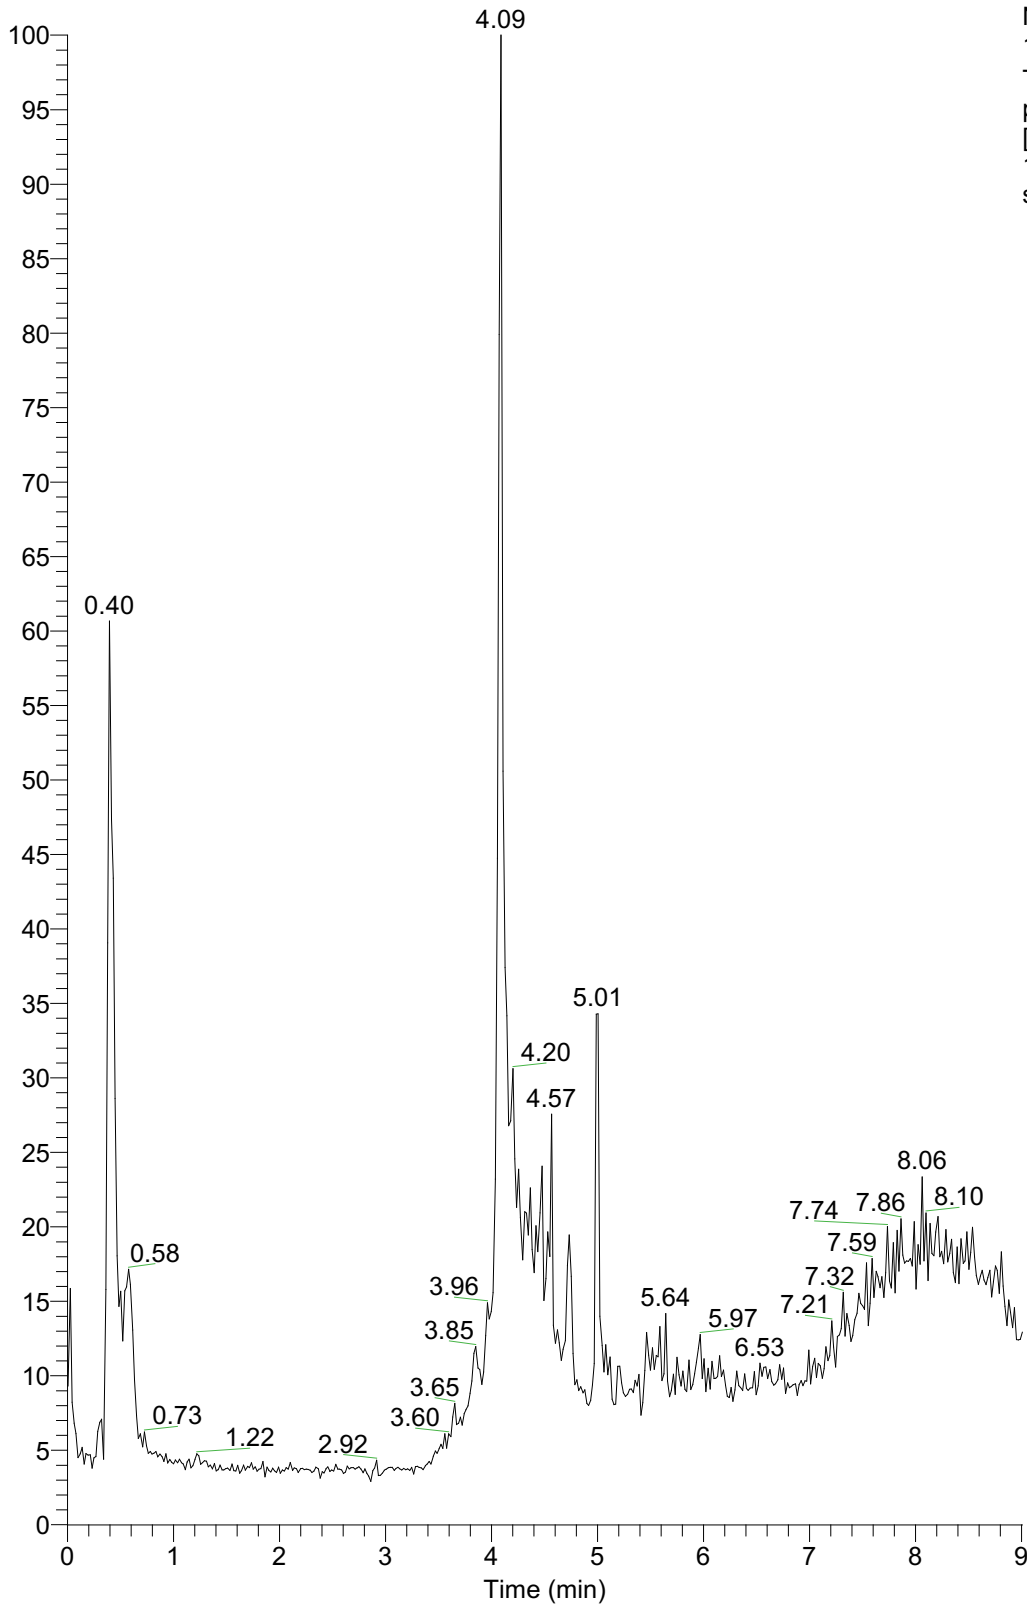

NL:  
1.81E9  
TIC F: FTMS -  
p ESI Full ms  
[100.0000-  
1200.0000] MS  
sample\_34

Figure S12: Representative chromatogram of a *S. ceratophylla* extract (sample S34).

RT: 0.00 - 9.00

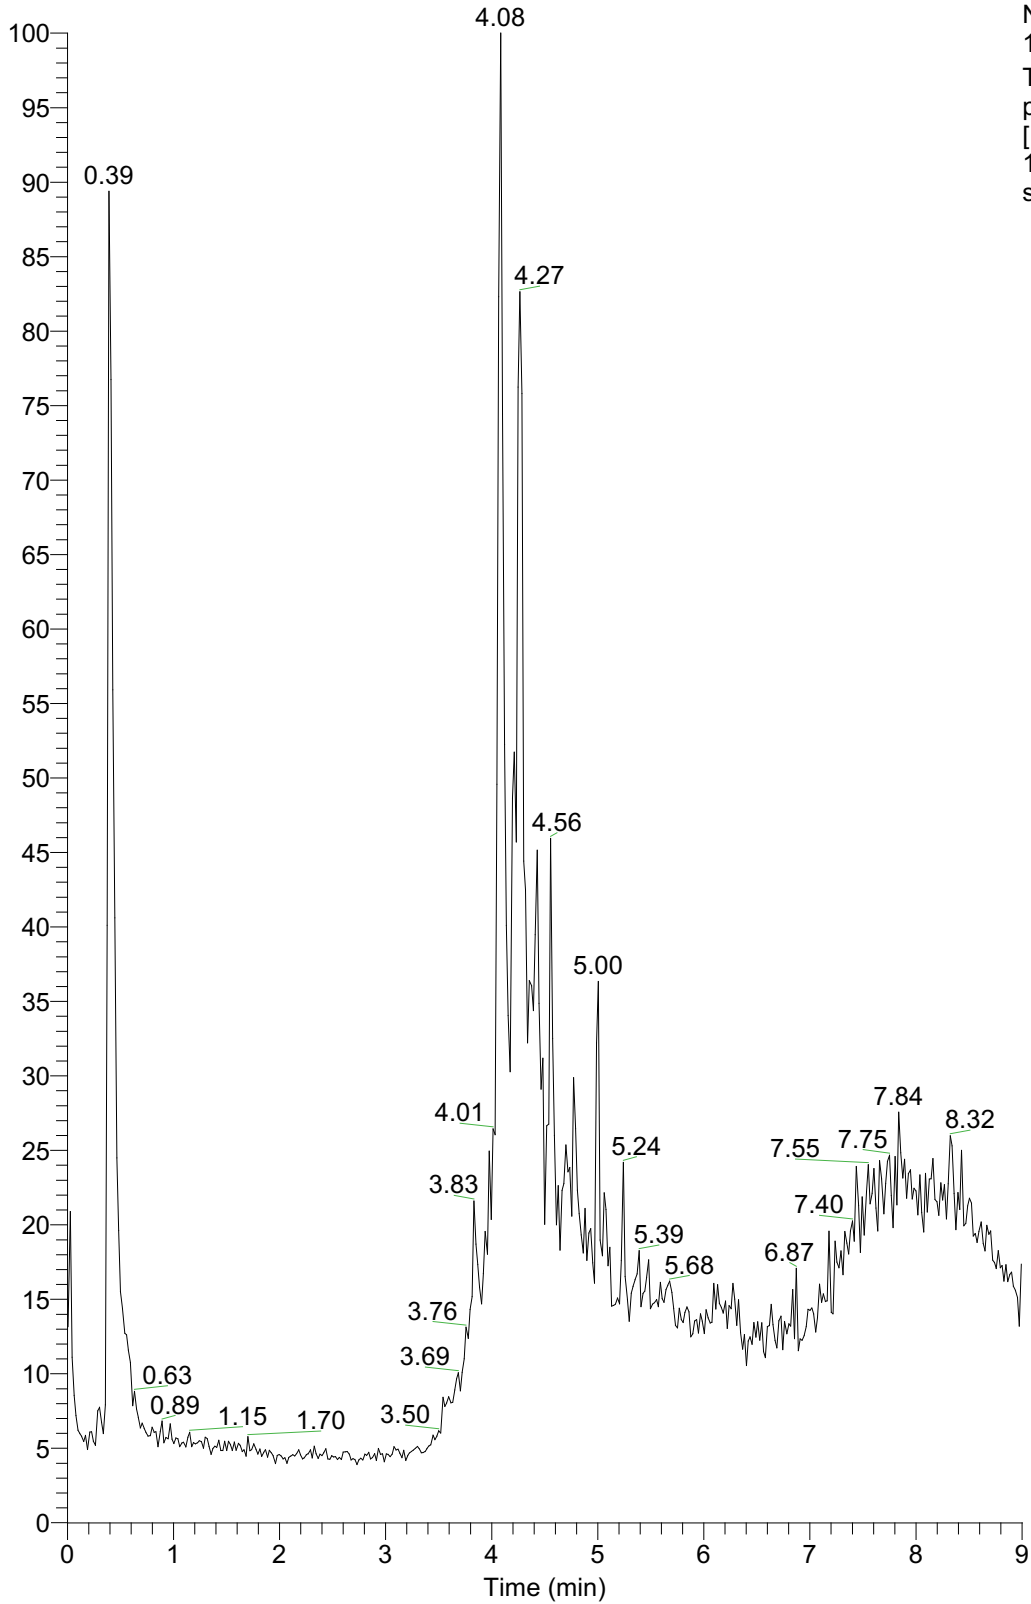

NL:  
1.54E9  
TIC F: FTMS -  
p ESI Full ms  
[100.0000-  
1200.0000] MS  
sample\_45

Figure S13: Representative chromatogram of an extract of *S. macrochlamys* (sample S45).



RT: 0.00 - 9.01

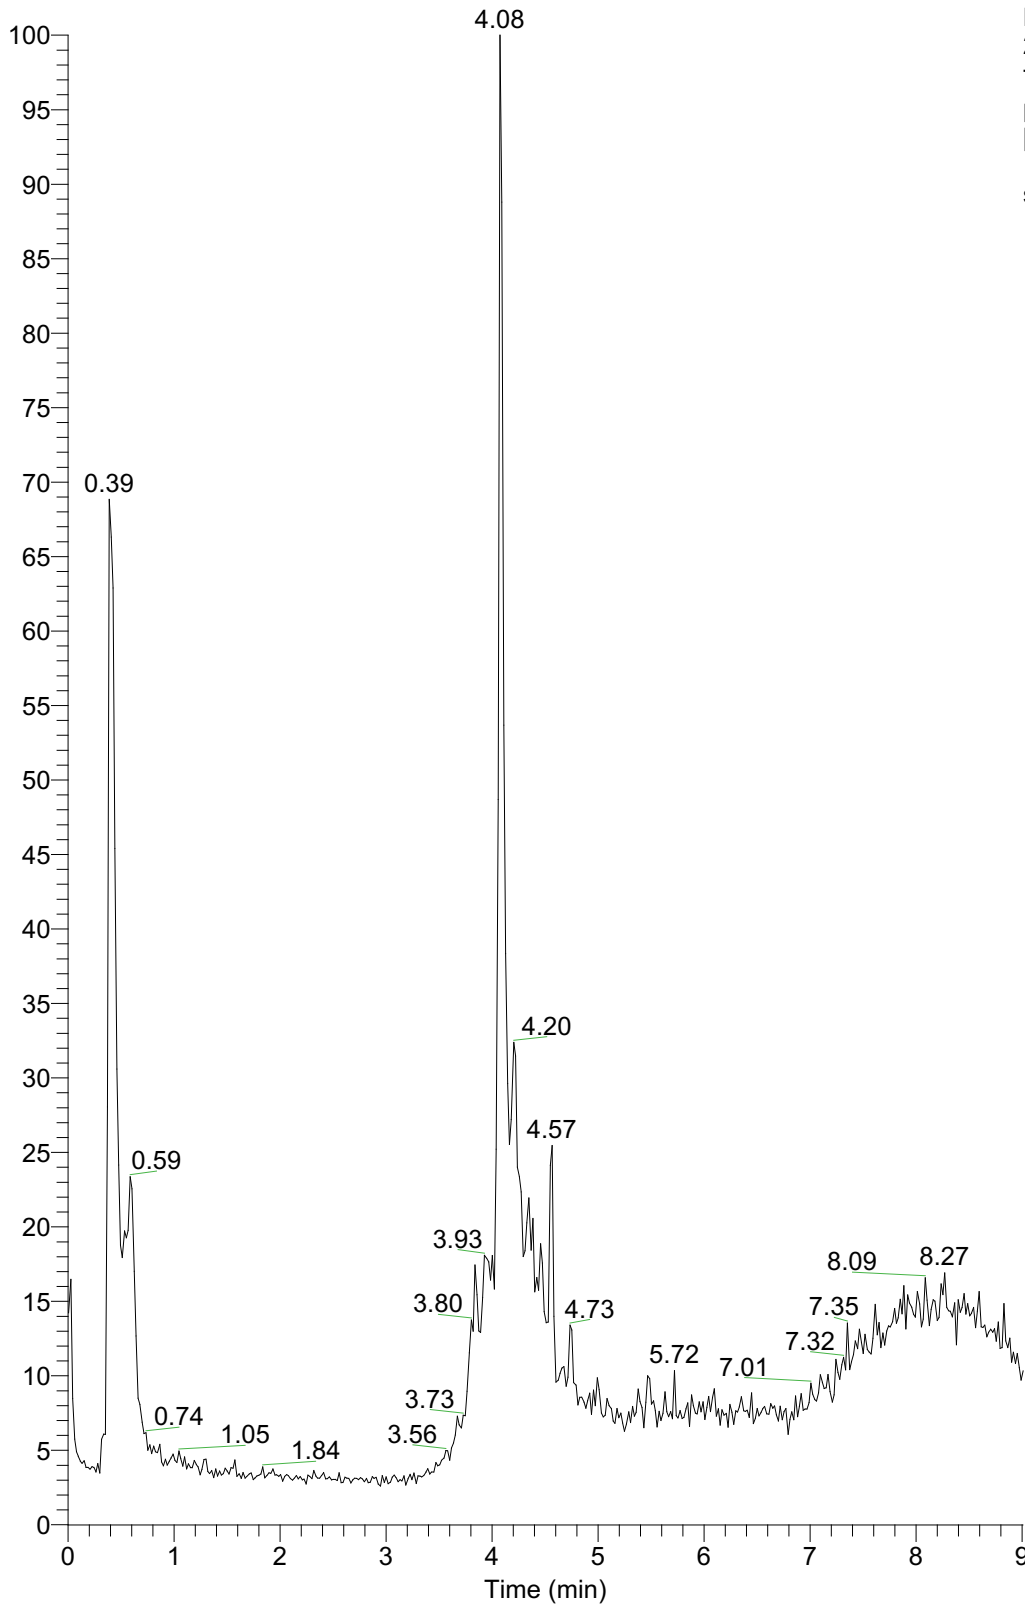

NL:  
2.32E9  
TIC F: FTMS -  
p ESI Full ms  
[100.0000-  
1200.0000] MS  
sample\_49

Figure S14: Representative chromatogram of an extract of *S. candidissima* (sample S49).

RT: 0.00 - 9.01

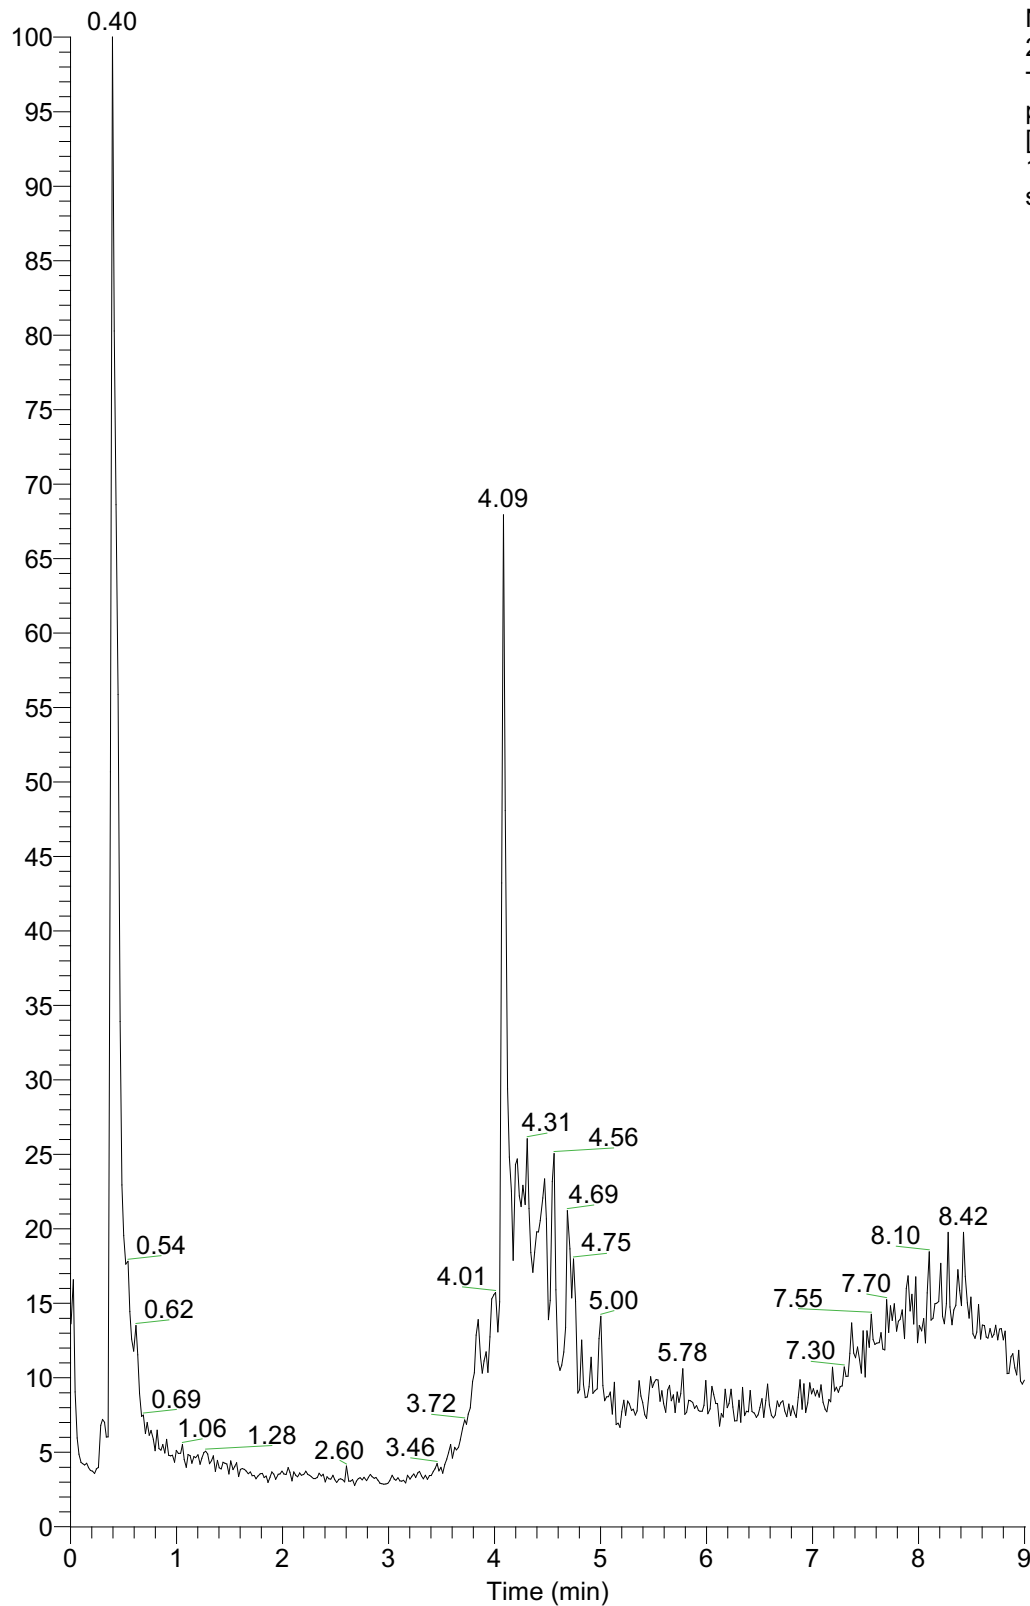

NL:  
2.35E9  
TIC F: FTMS -  
p ESI Full ms  
[100.0000-  
1200.0000] MS  
sample\_60

**Figure S15:** Representative chromatogram of a *S. aethiopsis* extract (sample S60).

RT: 0.00 - 9.01

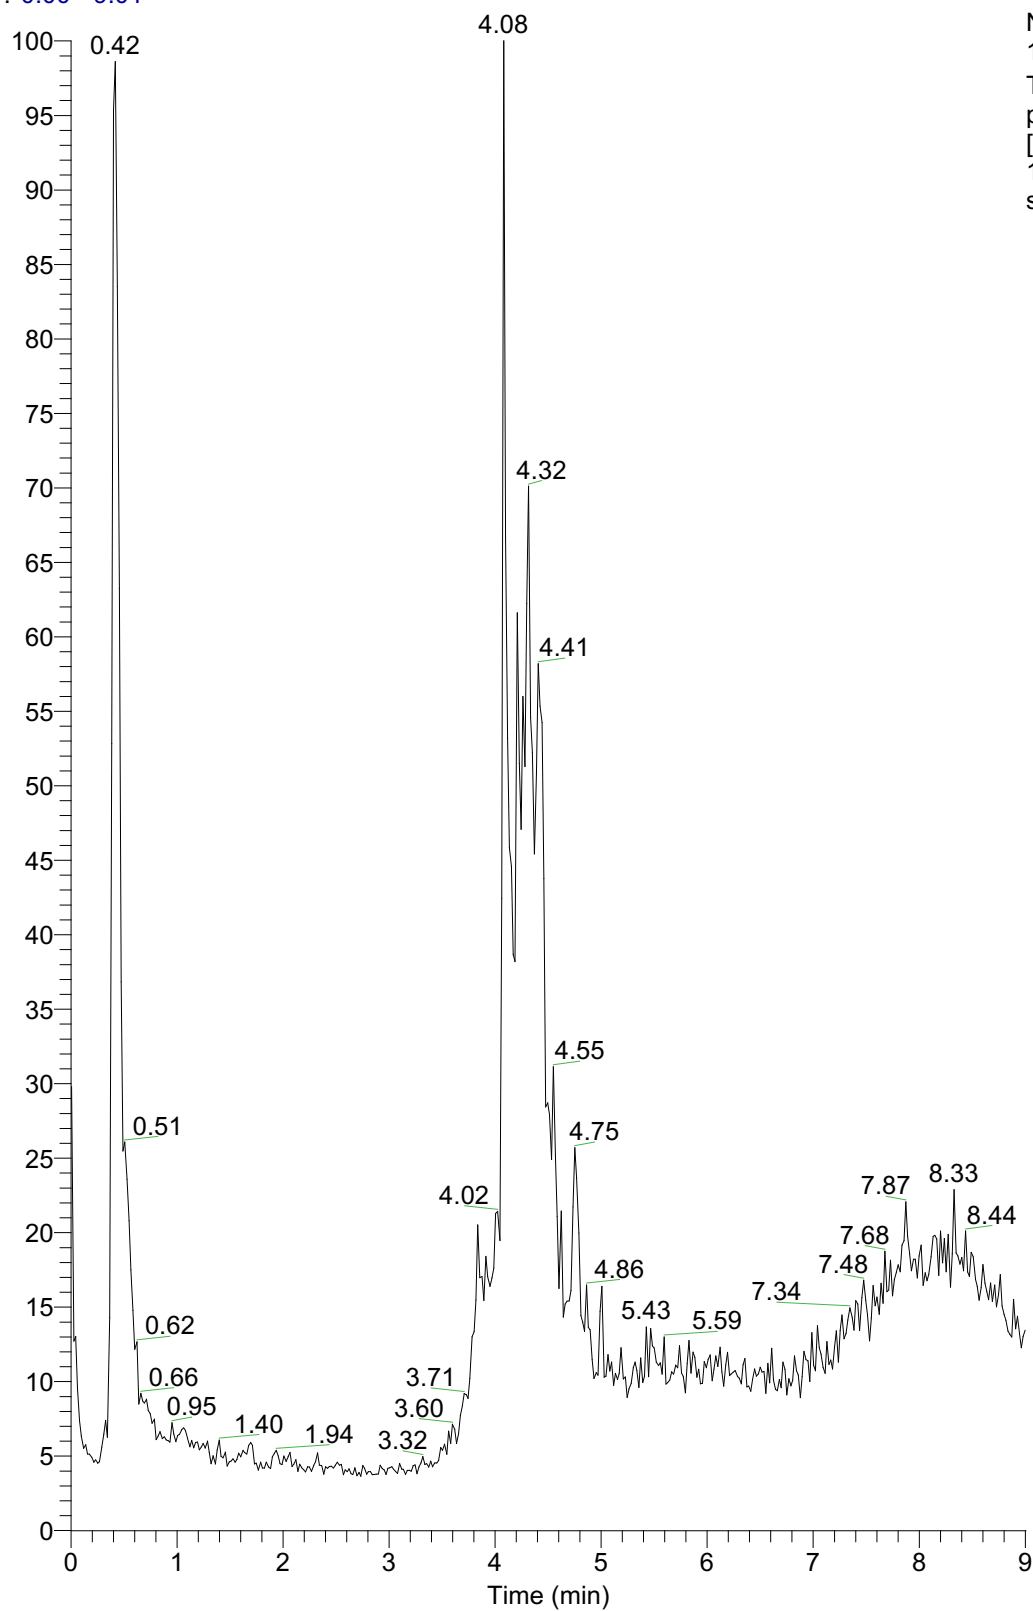

NL:  
1.91E9  
TIC F: FTMS -  
p ESI Full ms  
[100.0000-  
1200.0000] MS  
sample\_62

Figure S16: Representative chromatogram of an extract of *S. sahendica* (sample S62).

RT: 0.00 - 9.01

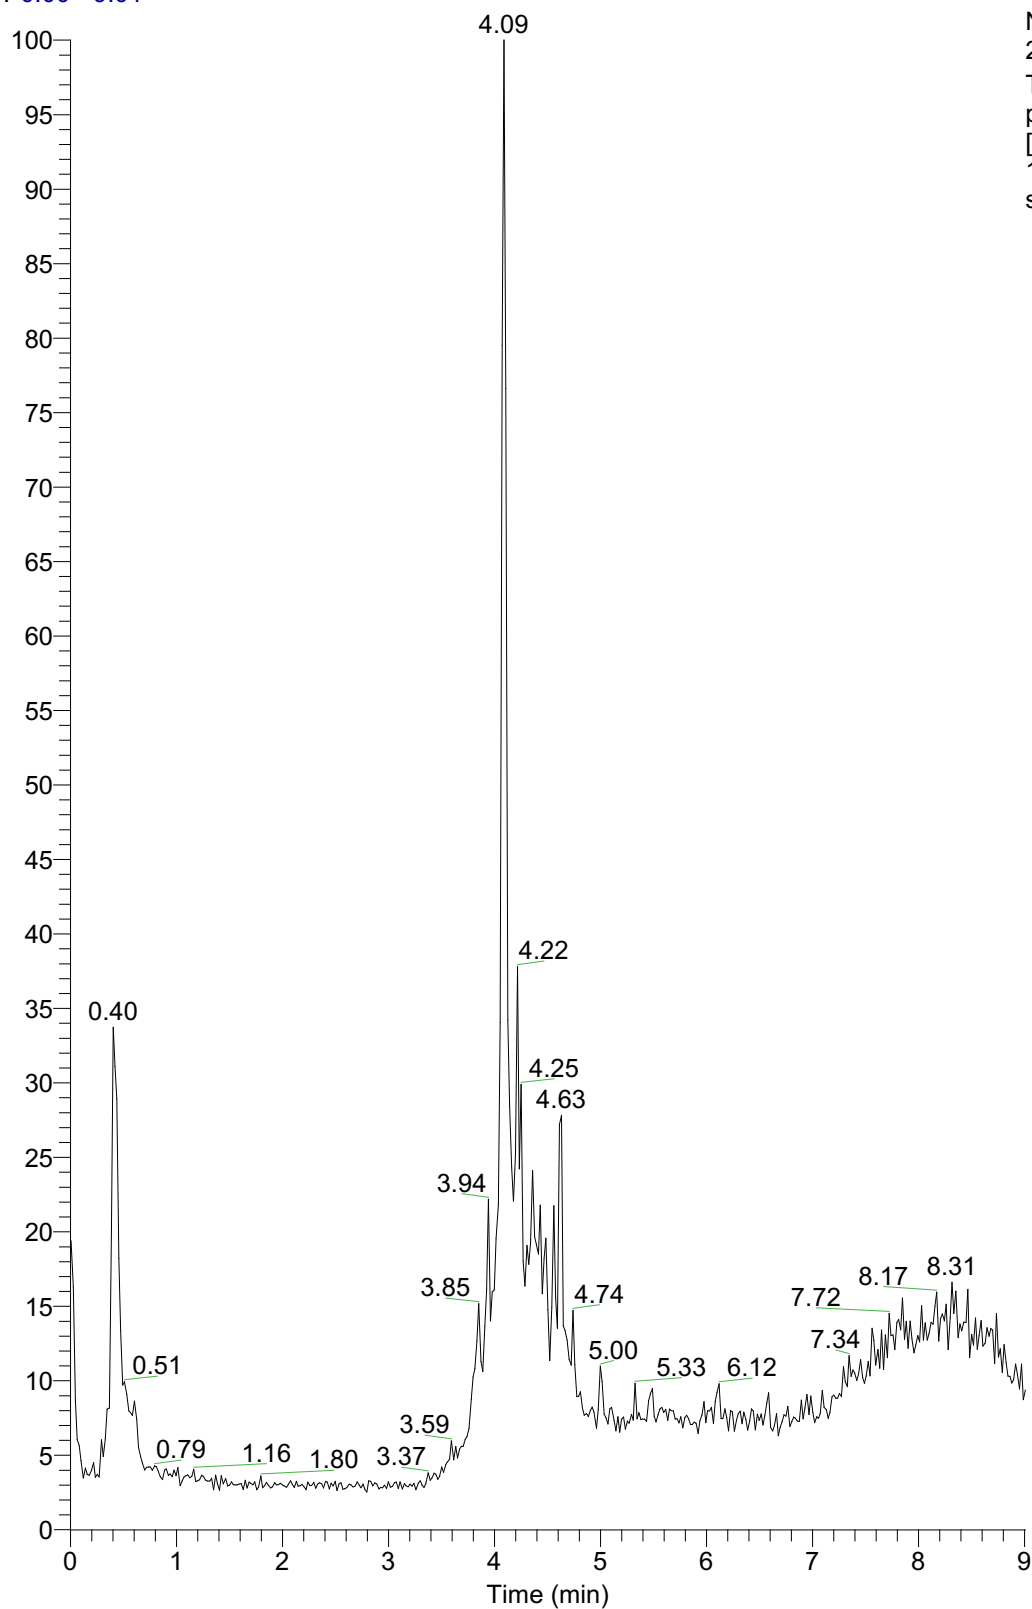

NL:  
2.33E9  
TIC F: FTMS -  
p ESI Full ms  
[100.0000-  
1200.0000] MS  
sample\_76

Figure S17: Representative chromatogram of an extract of *Salvia. sp* (sample S76).

RT: 0.00 - 9.01

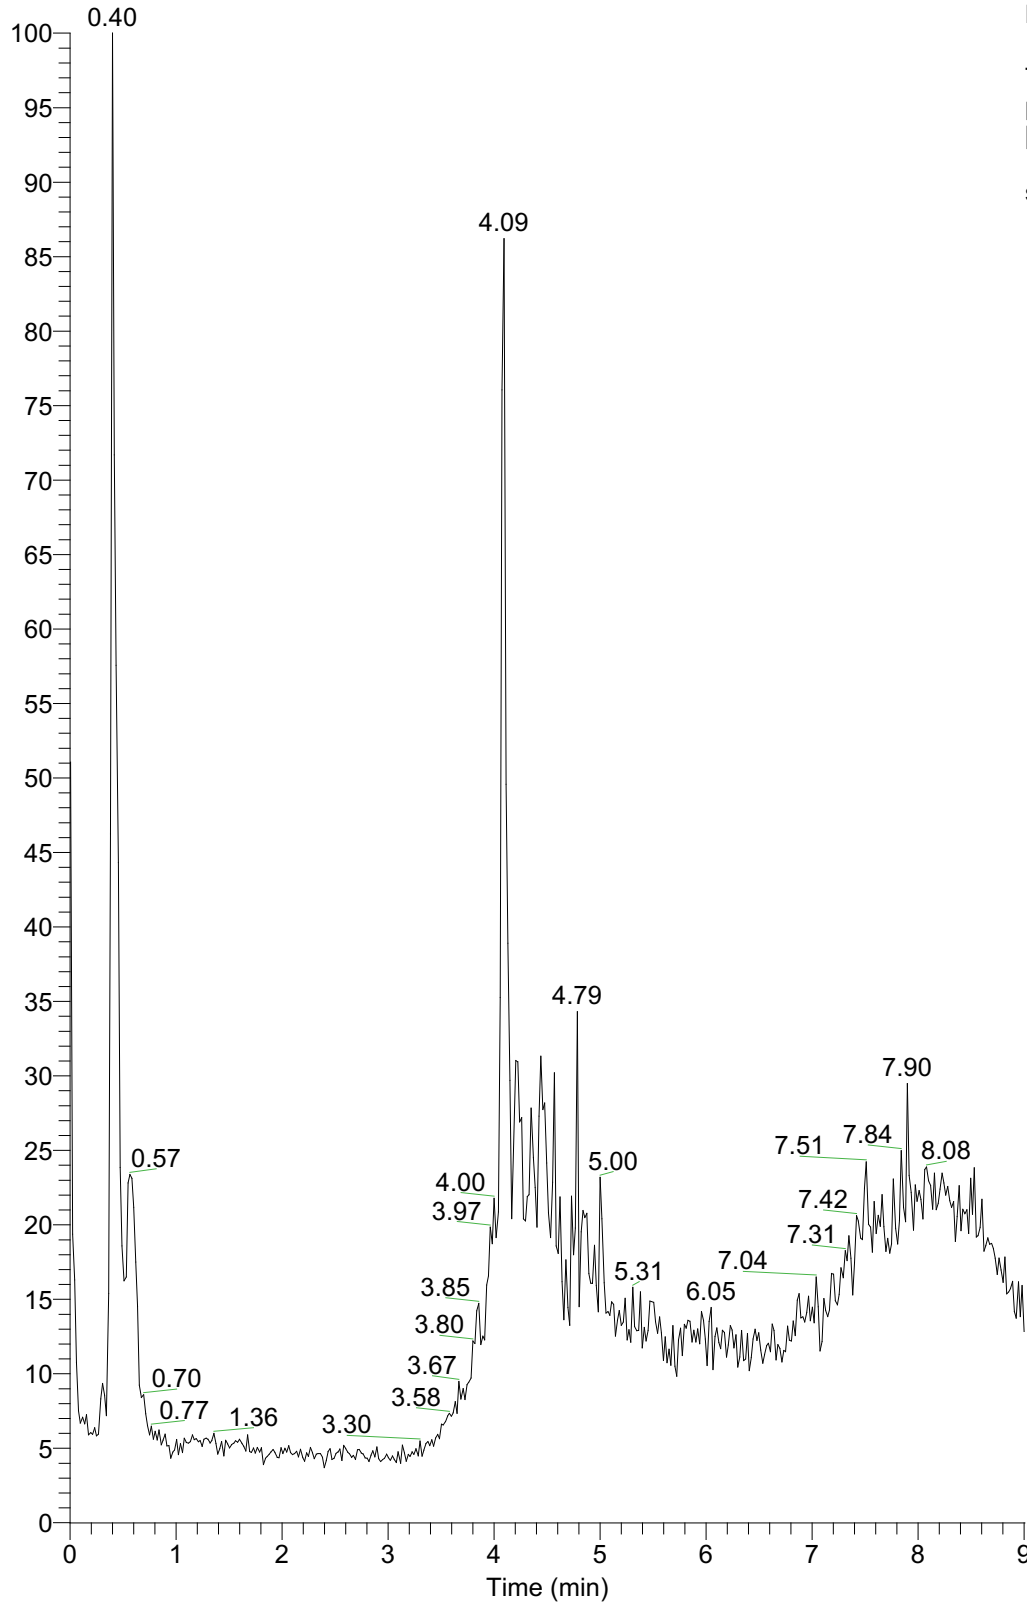

NL:  
1.48E9  
TIC F: FTMS -  
p ESI Full ms  
[100.0000-  
1200.0000] MS  
sample\_82

Figure S18: Representative chromatogram of an extract of *S. poculata* (sample S82).

RT: 0.00 - 9.01

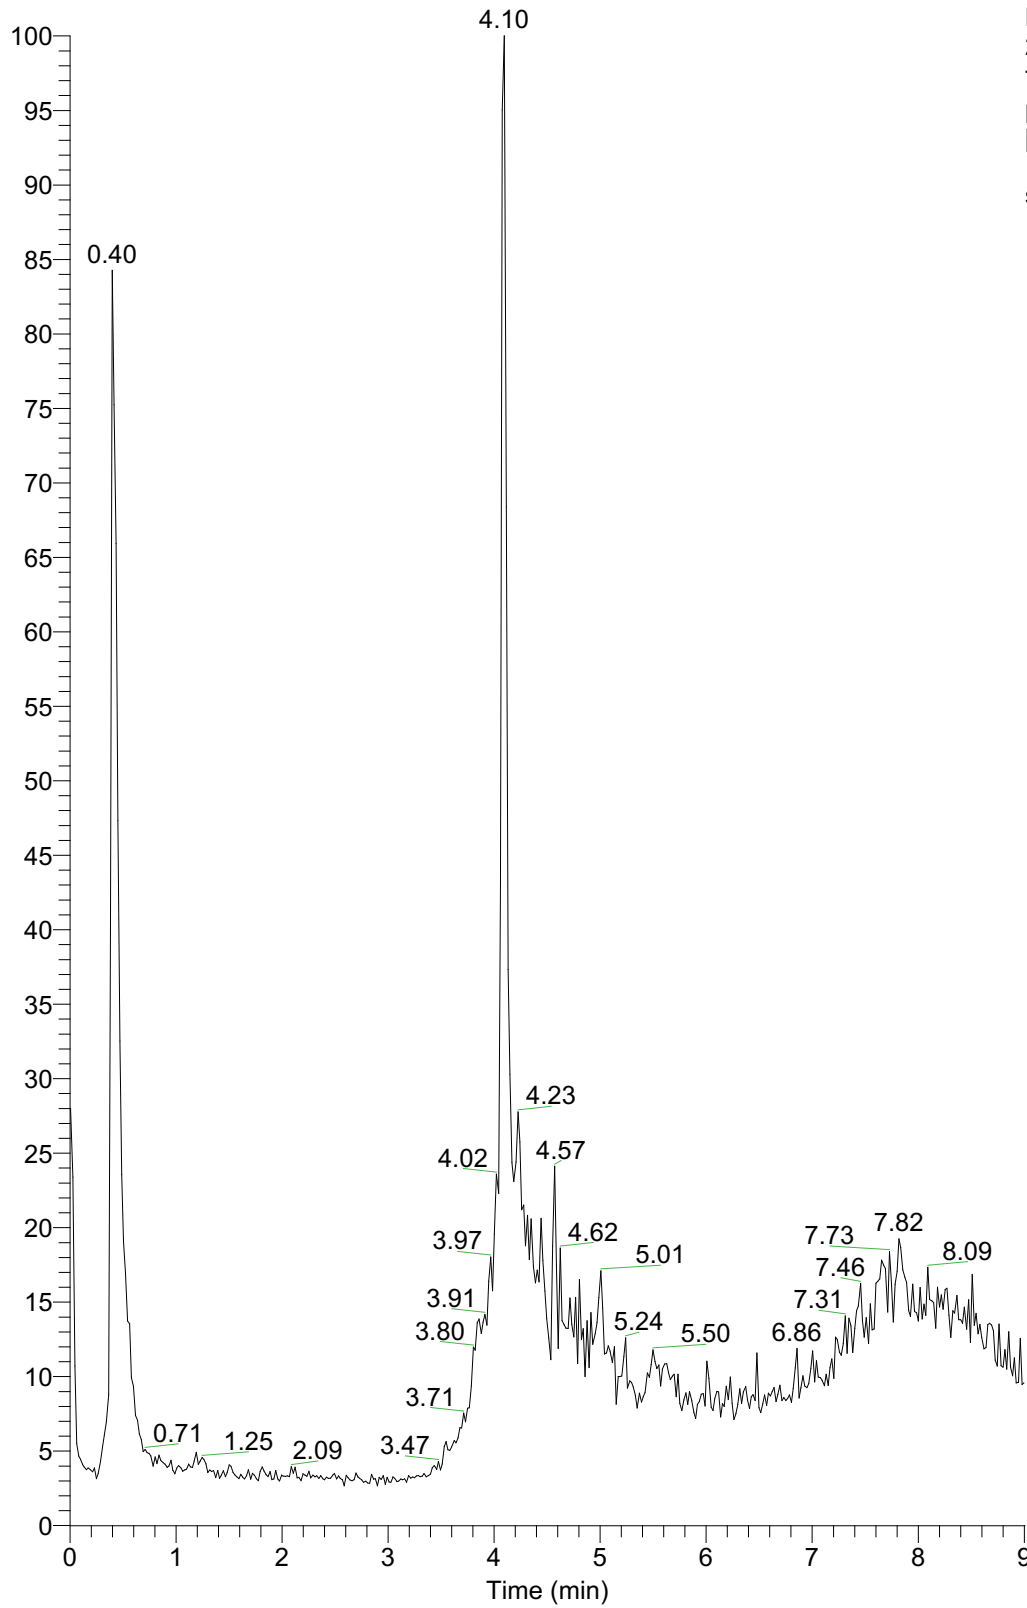

NL:  
2.21E9  
TIC F: FTMS -  
p ESI Full ms  
[100.0000-  
1200.0000] MS  
sample\_83

Figure S19: Representative chromatogram of an extract of *S. hydrangea* (sample S83).

RT: 0.00 - 9.01

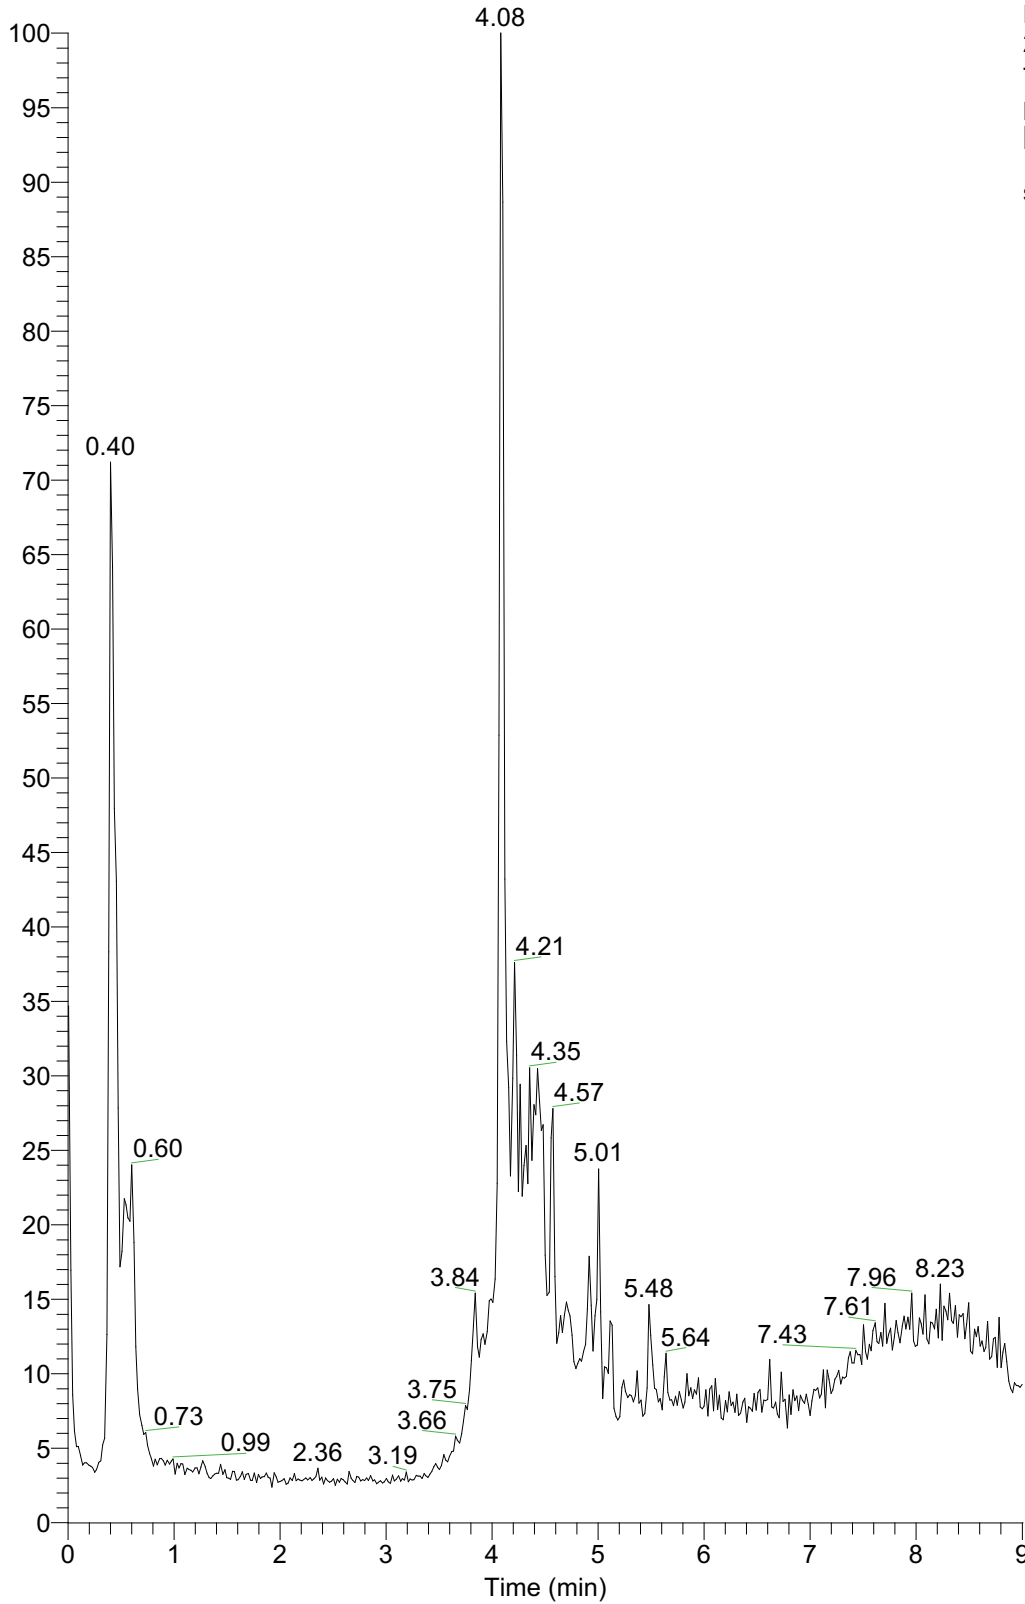

NL:  
2.35E9  
TIC F: FTMS -  
p ESI Full ms  
[100.0000-  
1200.0000] MS  
sample\_88

**Figure S20:** Representative chromatogram of an extract of *S. grossheimii* (sample S88).

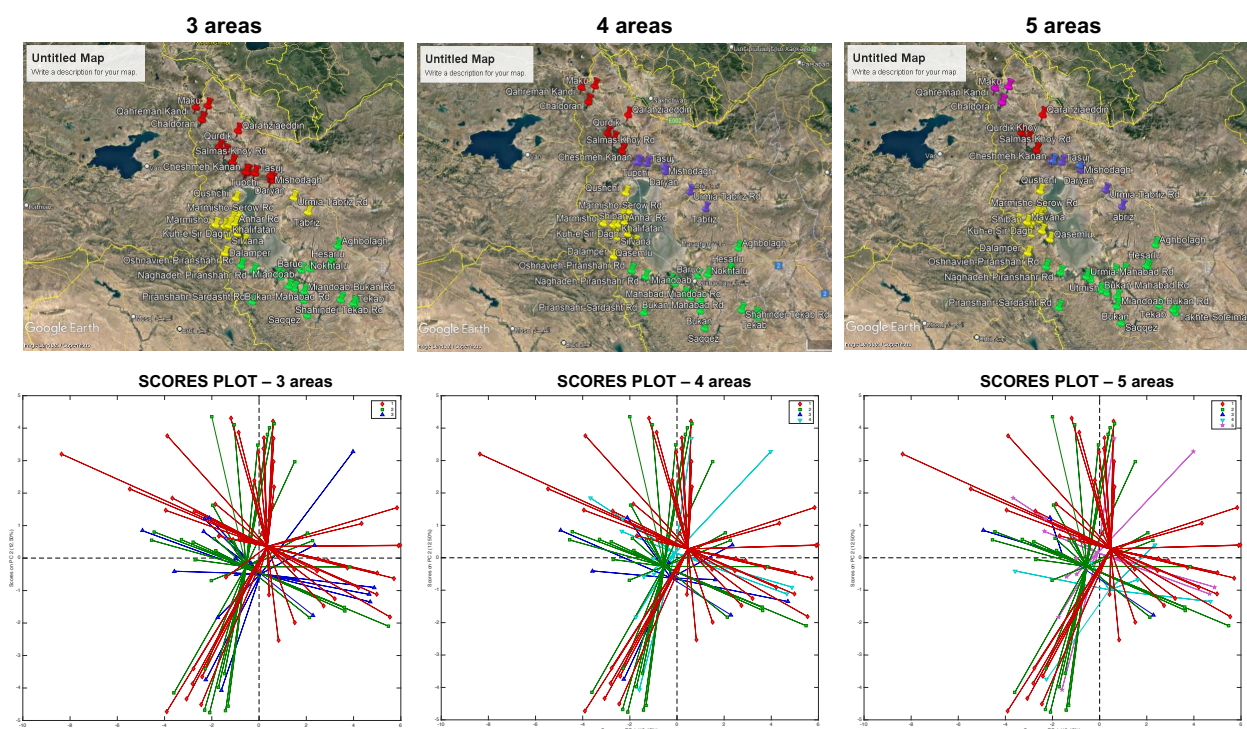

**Figure S21:** (Top) Satellite image of West Azerbaijan Province showing 3, 4 or 5 distinct collection areas where *Salvia* samples were picked. (Bottom) PCA scores plot coloured by collection areas obtained from the data of the 10 colorimetric determinations (TPC, TFC, TTC, AAC, FRAP, DPPH, Ca, Cb, Cxc, and  $\beta$ -carotene) and 40 chemical compounds identified for the 102 *Salvia* extracts. No significant separation was observed. Keys (left satellite image): 1<sup>st</sup> collection area, red; 2<sup>nd</sup> collection area, yellow; 3<sup>rd</sup> collection area, green. Keys (middle satellite image): 1<sup>st</sup> collection area, red; 2<sup>nd</sup> collection area, purple; 3<sup>rd</sup> collection area, yellow; 4<sup>th</sup> collection area, green. Keys (right satellite image): 1<sup>st</sup> collection area, red; 2<sup>nd</sup> collection area, purple; 3<sup>rd</sup> collection area, yellow; 4<sup>th</sup> collection area, green; 5<sup>th</sup> collection area, pink. Keys (left PCA scores plot): 1<sup>st</sup> collection area, red; 2<sup>nd</sup> collection area, green; 3<sup>rd</sup> collection area, blue. Keys (middle PCA scores plot): 1<sup>st</sup> collection area, red; 2<sup>nd</sup> collection area, green; 3<sup>rd</sup> collection area, blue; 4<sup>th</sup> collection area, light blue. Keys (right PCA scores plot): 1<sup>st</sup> collection area, red; 2<sup>nd</sup> collection area, green; 3<sup>rd</sup> collection area, blue; 4<sup>th</sup> collection area, light blue; 5<sup>th</sup> collection area, pink.
